# Supplementary material for: Questing for homoleptic mononuclear manganese complexes with monodentate O-donor ligands
Source: Royal Society of Chemistry journal article supplement (doi:10.1039/d4sc00543k), 2024-01-01
Supplement: d4sc00543k1.pdf [file d4sc00543k1.pdf]

## Supporting Information

for

# Questing for Homoleptic Mononuclear Manganese Complexes with Monodentate O-Donor Ligands

Alberto Pérez-Bitrián,\* Julen Munárriz,\* Konstantin B. Krause, Johanna Schlögl, Kurt. F. Hoffmann, Johanna S. Sturm, Amiera N. Hadi, Christian Teutloff, Anja Wiesner, Christian Limberg, Sebastian Riedel\*

### Table of contents

|                                         |     |
|-----------------------------------------|-----|
| 1. Experimental section                 | S2  |
| 2. IR spectra                           | S5  |
| 3. Crystal data                         | S7  |
| 4. Magnetic susceptibility measurements | S11 |
| 5. EPR spectra                          | S18 |
| 6. Quantum-chemical calculations        | S20 |
| 7. Bond Valence Sum analysis            | S45 |
| 8. References                           | S46 |

## 1. Experimental section

### 1.1. General procedures and materials

All experiments were performed under rigorous exclusion of moisture and oxygen using standard Schlenk techniques. Solids were handled in a MBRAUN UNILab plus glovebox under an argon atmosphere ( $O_2 < 0.5$  ppm,  $H_2O < 0.5$  ppm). Solvents were dried using a MBraun SPS-800 solvent system ( $CH_2Cl_2$ , *n*-pentane), or over 3 Å molecular sieves (*o*-difluorobenzene (*o*DFB)).  $[NEt_4]_2[MnCl_4]$ ,<sup>1</sup>  $AgOTeF_5$ ,<sup>2,3</sup> and  $ClOTeF_5$ <sup>4</sup> were prepared as described elsewhere.  $[PPh_4]_2[MnCl_4]$  was prepared following an analogous synthetic procedure to that used for  $[NEt_4]_2[MnCl_4]$ .<sup>1</sup> All other reagents were purchased from standard commercial suppliers and used as received. Elemental analyses (CHNS) were carried out using a VARIO EL elemental analyzer. IR spectra were measured on neat solid samples at room temperature inside a glovebox under an argon atmosphere using a Bruker ALPHA FTIR spectrometer with a diamond ATR attachment with 32 scans and a resolution of  $4\text{ cm}^{-1}$ . EPR spectra of **1** were recorded in the X-band at 298 K with a Magnetech MS 5000 spectrometer. W-band measurements were performed at 20 K with a Bruker Elexsys E680. The samples were sealed in argon atmosphere inside 50  $\mu\text{L}$  Hirschmann glass capillaries. Simulations were performed with Easyspin.<sup>5</sup> Crystal data were collected with  $MoK\alpha$  radiation on a Bruker D8 Venture diffractometer with a CMOS area detector. Single crystals were picked at  $-40\text{ }^\circ\text{C}$  under nitrogen atmosphere and mounted on a 0.15 mm Mitegen micromount using perfluoroether oil. The structures were solved with the ShelXT<sup>6</sup> structure solution program using intrinsic phasing and refined with the ShelXL<sup>7</sup> refinement package using least squares minimizations by using OLEX2.<sup>8</sup> The program Diamond V4.6.4 was used for visualization.<sup>9</sup> CCDC 2287496 contains the supplementary crystallographic data for this paper. These data are provided free of charge by The Cambridge Crystallographic Data Centre. Crystal data and other details of the structure analyses are summarized in Table S1 and Table S2. Suitable crystals for X-ray diffraction studies were obtained as indicated in the corresponding experimental entry.

### 1.2. Synthesis of $[NEt_4]_2[Mn(OTeF_5)_4]$ (**1**)

A mixture of  $[NEt_4]_2[MnCl_4]$  (50 mg, 109  $\mu\text{mol}$ , 1 equiv.) and  $AgOTeF_5$  (152 mg, 437  $\mu\text{mol}$ , 4 equiv.) in  $CH_2Cl_2$  (10 mL) was stirred in the dark at room temperature for

2 h. The resulting suspension was filtered to separate the colorless solution from the white insoluble solid (AgCl), which was subsequently extracted with more CH<sub>2</sub>Cl<sub>2</sub> (2 x 5 mL). The colorless filtrate was evaporated to dryness, rendering an off-white solid that was dried under vacuum and identified as compound **1** (95 mg, 75 μmol, 68%).

**IR** (ATR, 298 K, Figure S1):  $\tilde{\nu} / \text{cm}^{-1} = 3001$  (w), 2959 (w), 2856 (w), 1654 (w), 1486 (m), 1459 (w), 1443 (w), 1396 (w), 1368 (w), 1305 (w), 1241 (w), 1186 (w), 1173 (w), 1070 (w), 1053 (w), 1032 (w), 1001 (w), 854 (m Te–O), 783 (m), 661 (vs, Te–F), 615 (m), 463 (w), 413 (m, Mn–O).

**Elemental analysis** calcd (%) for C<sub>16</sub>H<sub>40</sub>F<sub>20</sub>MnN<sub>2</sub>O<sub>4</sub>Te<sub>4</sub>: C 15.1, H 3.2, N 2.2; found: C 15.6, H 3.8, N 2.2.

### 1.3. Synthesis of [PPh<sub>4</sub>]<sub>2</sub>[Mn(OTeF<sub>5</sub>)<sub>4</sub>] (**1**\*)

By using the procedure described for the synthesis of **1**, compound **1**\* was prepared starting from [PPh<sub>4</sub>]<sub>2</sub>[MnCl<sub>4</sub>] (50 mg, 57 μmol, 1 equiv.) and AgOTeF<sub>5</sub> (79 mg, 228 μmol, 4 equiv.). Complex **1**\* was obtained as an off-white solid (25 mg, 14.8 μmol, 26%).

**IR** (ATR, 298 K, Figure S3):  $\tilde{\nu} / \text{cm}^{-1} = 2958$  (w), 2924 (w), 2854 (w), 1652 (w), 1586 (w), 1485 (m), 1438 (w), 1398 (w), 1378 (w), 1341 (w), 1316 (w), 1298 (w), 1260 (w), 1186 (w), 1169 (w), 1108 (m), 1074 (w), 1027 (w), 997 (w), 850 (m, sh, Te–O), 760 (w), 724 (m), 691 (m), 667 (vs, Te–F), 616 (m), 524 (vs), 447 (w), 415 (m, Mn–O).

### 1.4. Crystal growth of [PPh<sub>4</sub>]<sub>2</sub>[Mn(OTeF<sub>5</sub>)<sub>4</sub>] (**1**\*)

A saturated solution of **1**\* in 1 mL *o*DFB was placed in a Y-shaped schlenk tube with a greaseless Teflon stopcock. In the side arm, 3 mL *n*-pentane were added. After some days at room temperature, colorless single crystals suitable for X-ray diffraction were obtained.

### 1.5. Synthesis of [NEt<sub>4</sub>]<sub>2</sub>[Mn(OTeF<sub>5</sub>)<sub>5</sub>] (**2**)

**Method A:** [NEt<sub>4</sub>]<sub>2</sub>[MnCl<sub>4</sub>] (100 mg, 219 μmol, 1 equiv.) was weighed into a Schlenk flask with a greaseless Teflon stopcock. After cooling down to –196 °C, ClOTeF<sub>5</sub> (420 mg, 1.53 mmol, 7 equiv.) was condensed onto it. The mixture was allowed to warm

to room temperature under stirring, giving rise to the evolution of Cl<sub>2</sub> as a yellow gas, whereas the solid turned initially red and eventually dark blue. After 1 h of stirring, all volatiles were removed and the product was dried overnight under vacuum, leading to a deep blue solid, which was identified as compound **2** (330 mg, 219 μmol, quant.).

**Method B:** Compound **1** (50 mg, 39 μmol, 1 equiv.) was weighed into a Schlenk flask with a greaseless Teflon stopcock. After cooling down to -196 °C, ClOTeF<sub>5</sub> (22 mg, 79 μmol, 2 equiv.) was condensed onto it. The mixture was allowed to warm to room temperature under stirring, giving rise to a dark blue solid and the evolution of Cl<sub>2</sub> as a yellow gas. After 1 h of stirring, all volatiles were removed and the product was dried overnight under vacuum, leading to a deep blue solid, which was identified as compound **2** (59 mg, 39 μmol, quant.).

**IR** (ATR, 298 K, Figure S4):  $\tilde{\nu}$  / cm<sup>-1</sup> = 3002 (w), 1486 (m), 1457 (w), 1443 (w), 1417 (w), 1396 (w), 1369 (w), 1188 (w), 1173 (w), 1068 (w), 1053 (w), 1000 (w), 918 (w), 827 (s Te-O), 784 (m), 693 (s, Te-F), 670 (vs, Te-F), 632 (m), 483 (m, Mn-O), 417 (w, Mn-O).

**Elemental analysis** calcd (%) for C<sub>16</sub>H<sub>40</sub>F<sub>25</sub>MnN<sub>2</sub>O<sub>5</sub>Te<sub>5</sub>: C 12.7, H 2.7, N 1.9; found: C 13.2, H 2.6, N 3.2.

### 1.6. Crystal growth of [NEt<sub>4</sub>]<sub>2</sub>[Mn(OTeF<sub>5</sub>)<sub>5</sub>] (**2**)

Blue single crystals to be analyzed by X-ray diffraction were obtained by slow diffusion of a layer of *n*-pentane (1.5 mL) into a solution of compound **2** in *o*DFB (ca. 10 mg in 1 mL) at -24 °C.

## 2. IR Spectra

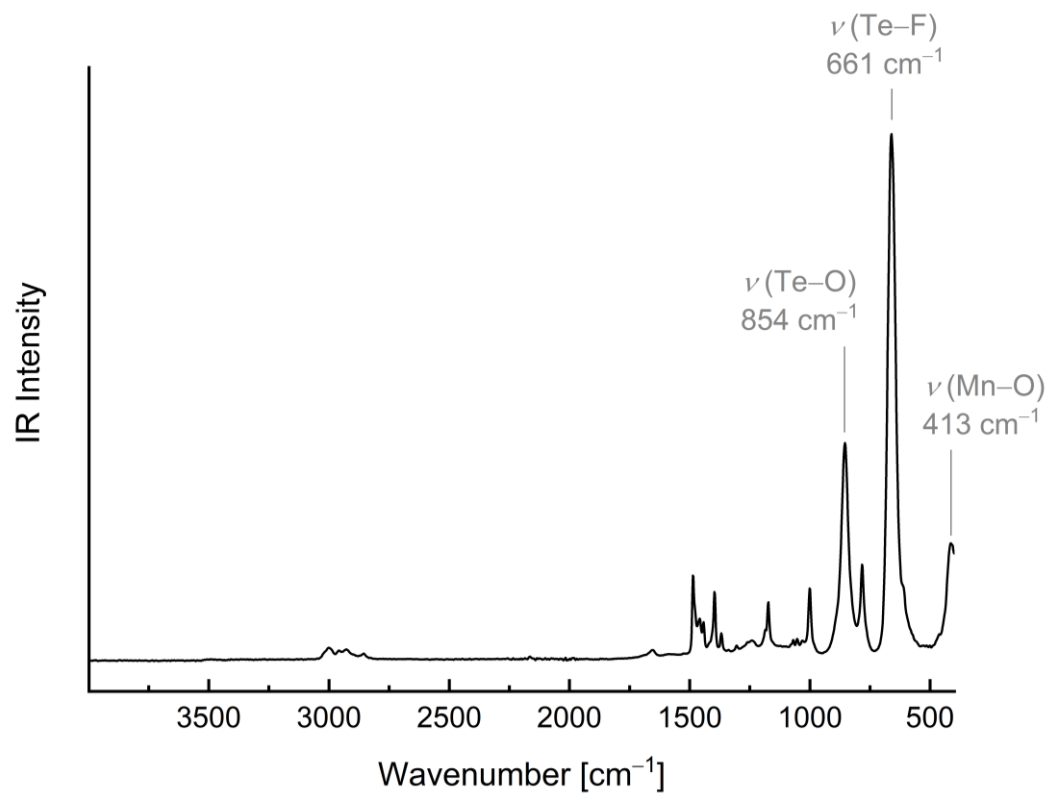

**Figure S1.** IR spectrum (ATR, 298 K) of [NEt<sub>4</sub>]<sub>2</sub>[Mn(OTeF<sub>5</sub>)<sub>4</sub>] (**1**).

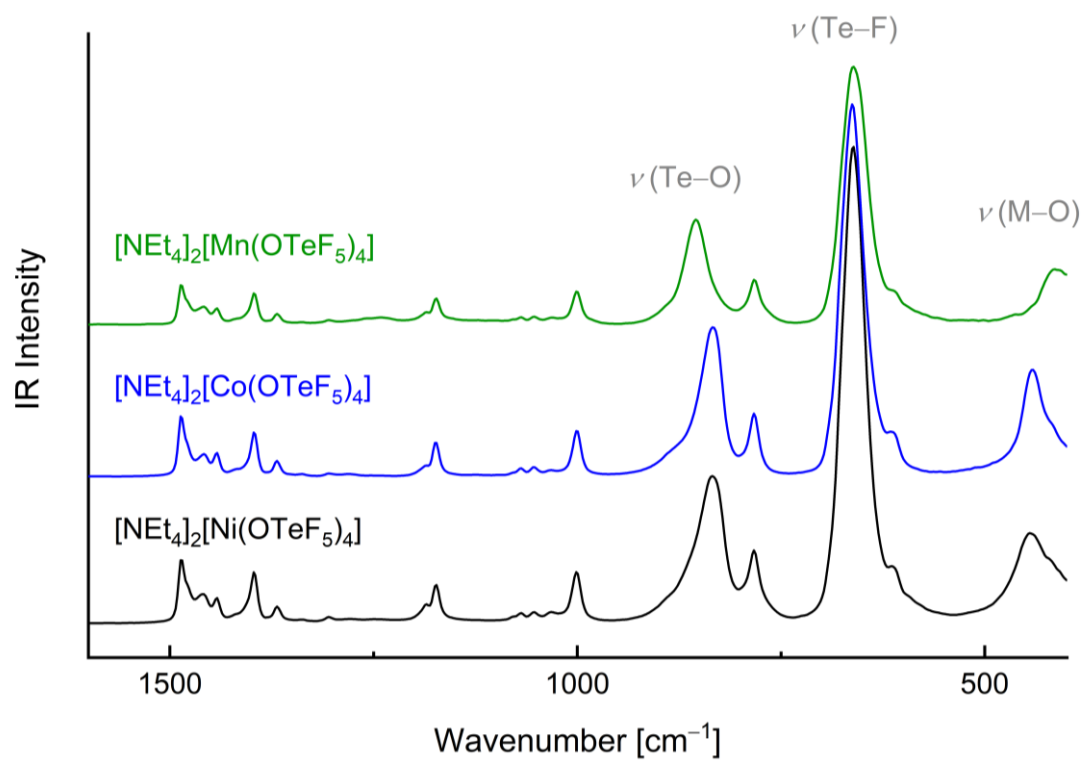

**Figure S2.** Comparison of the IR spectra (ATR, 298 K) of [NEt<sub>4</sub>]<sub>2</sub>[M(OTeF<sub>5</sub>)<sub>4</sub>] salts (M = Ni, Co, Mn).

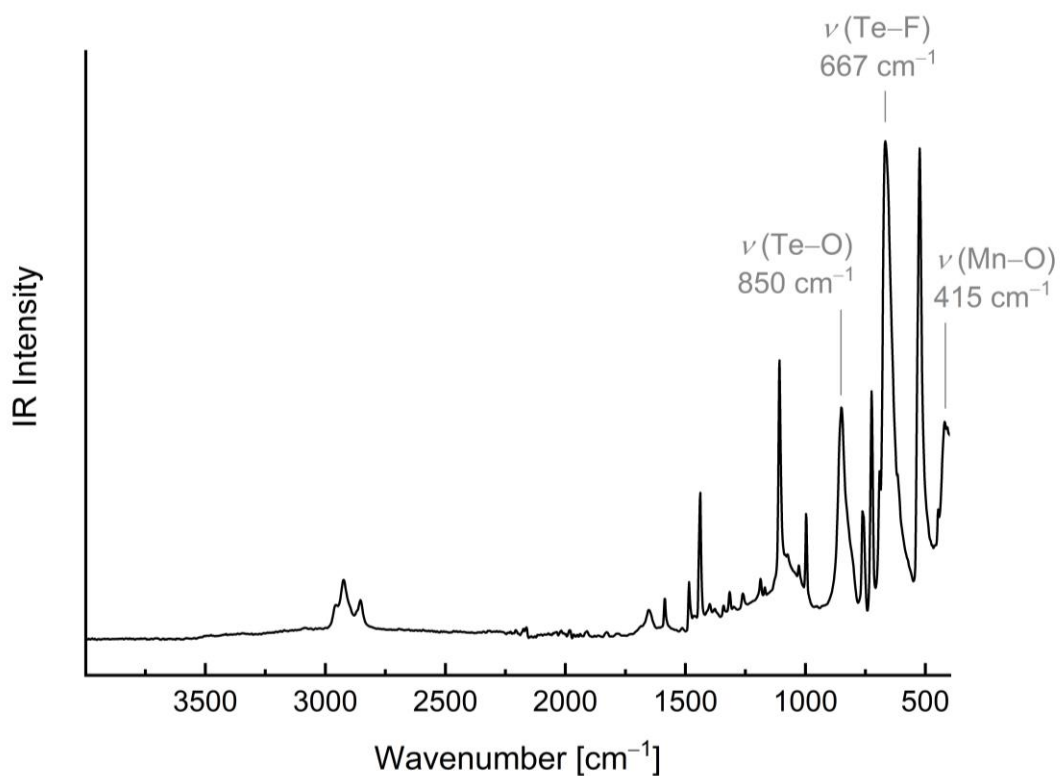

**Figure S3.** IR spectrum (ATR, 298 K) of  $[\text{PPh}_4]_2[\text{Mn}(\text{OTeF}_5)_4]$  (**1\***).

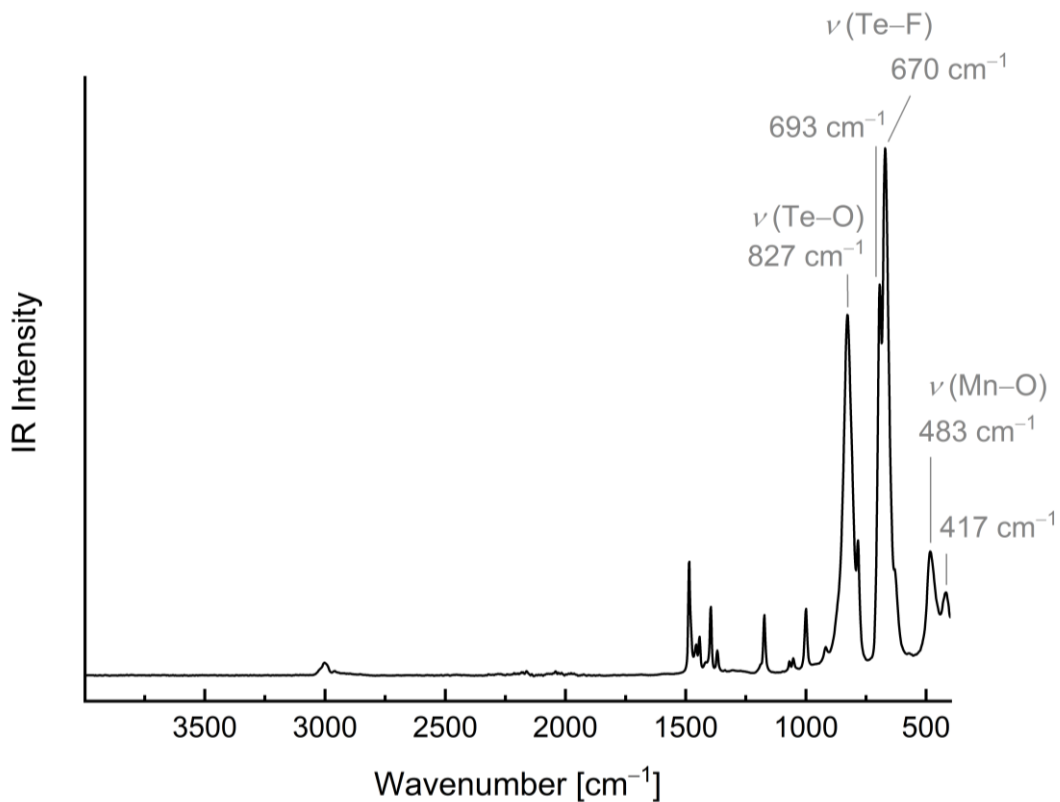

**Figure S4.** IR spectrum (ATR, 298 K) of  $[\text{NEt}_4]_2[\text{Mn}(\text{OTeF}_5)_5]$  (**2**).

### 3. Crystal data

#### 3.1. Summary of crystal data and structure refinement

**Table S1.** Crystal data and structure refinement for compound [PPh<sub>4</sub>]<sub>2</sub>[Mn(OTeF<sub>5</sub>)<sub>4</sub>] (**1\***).

|                                                              |                                                                                                 |
|--------------------------------------------------------------|-------------------------------------------------------------------------------------------------|
| Empirical formula                                            | C <sub>48</sub> H <sub>40</sub> F <sub>20</sub> MnO <sub>4</sub> P <sub>2</sub> Te <sub>4</sub> |
| Formula weight                                               | 1688.08                                                                                         |
| Temperature [K]                                              | 273.15                                                                                          |
| Crystal system                                               | tetragonal                                                                                      |
| Space group                                                  | <i>I</i> 4 <sub>1</sub> / <i>a</i>                                                              |
| <i>a</i> [pm]                                                | 1186.07(3)                                                                                      |
| <i>b</i> [pm]                                                | 1186.07(3)                                                                                      |
| <i>c</i> [pm]                                                | 3983.39(19)                                                                                     |
| $\alpha$ [°]                                                 | 90                                                                                              |
| $\beta$ [°]                                                  | 90                                                                                              |
| $\gamma$ [°]                                                 | 90                                                                                              |
| Volume [Å <sup>3</sup> ]                                     | 5603.7(4)                                                                                       |
| <i>Z</i>                                                     | 4                                                                                               |
| $\rho_{calc}$ [g·cm <sup>-3</sup> ]                          | 2.001                                                                                           |
| $\mu$ [mm <sup>-1</sup> ]                                    | 2.442                                                                                           |
| F(000)                                                       | 3212.0                                                                                          |
| Crystal size [mm <sup>3</sup> ]                              | 0.174 × 0.13 × 0.087                                                                            |
| Radiation                                                    | MoK $\alpha$ ( $\lambda$ = 0.71073)                                                             |
| 2 $\Theta$ range for data collection [°]                     | 4.604 to 52.718                                                                                 |
| Index ranges                                                 | -14 ≤ <i>h</i> ≤ 14, -14 ≤ <i>k</i> ≤ 14, -49 ≤ <i>l</i> ≤ 49                                   |
| Reflections collected                                        | 49322                                                                                           |
| Independent reflections                                      | 2771 [ <i>R</i> <sub>int</sub> = 0.0521, <i>R</i> <sub>sigma</sub> = 0.0214]                    |
| Data/restraints/parameters                                   | 2771/0/179                                                                                      |
| Goodness-of-fit on <i>F</i> <sup>2</sup>                     | 1.133                                                                                           |
| Final <i>R</i> indexes [ <i>I</i> ≥ 2 $\sigma$ ( <i>I</i> )] | <i>R</i> <sub>1</sub> = 0.0299<br><i>wR</i> <sub>2</sub> = 0.0644                               |
| Final <i>R</i> indexes [all data]                            | <i>R</i> <sub>1</sub> = 0.0393<br><i>wR</i> <sub>2</sub> = 0.0712                               |
| Largest diff. peak/hole [e·Å <sup>-3</sup> ]                 | 0.83/-0.93                                                                                      |
| CCDC number                                                  | 2287496                                                                                         |

**Table S2.** Crystal data and structure refinement for compound [NEt<sub>4</sub>]<sub>2</sub>[Mn(OTeF<sub>5</sub>)<sub>5</sub>] (**2**).

|                                                               |                                                                                                 |
|---------------------------------------------------------------|-------------------------------------------------------------------------------------------------|
| Empirical formula                                             | C <sub>16</sub> H <sub>40</sub> F <sub>25</sub> MnN <sub>2</sub> O <sub>5</sub> Te <sub>5</sub> |
| Formula weight                                                | 1508.44                                                                                         |
| Temperature [K]                                               | 273.15                                                                                          |
| Crystal system                                                | orthorhombic                                                                                    |
| Space group                                                   | <i>Pnna</i>                                                                                     |
| <i>a</i> [pm]                                                 | 1757.07(11)                                                                                     |
| <i>b</i> [pm]                                                 | 1888.73(9)                                                                                      |
| <i>c</i> [pm]                                                 | 1248.39(5)                                                                                      |
| $\alpha$ [°]                                                  | 90                                                                                              |
| $\beta$ [°]                                                   | 90                                                                                              |
| $\gamma$ [°]                                                  | 90                                                                                              |
| Volume [Å <sup>3</sup> ]                                      | 4142.9(4)                                                                                       |
| <i>Z</i>                                                      | 4                                                                                               |
| $\rho_{calc}$ [g·cm <sup>-3</sup> ]                           | 2.418                                                                                           |
| $\mu$ [mm <sup>-1</sup> ]                                     | 2.418                                                                                           |
| F(000)                                                        | 2.418                                                                                           |
| Crystal size [mm <sup>3</sup> ]                               | 0.38 × 0.21 × 0.041                                                                             |
| Radiation                                                     | MoK $\alpha$ ( $\lambda$ = 0.71073)                                                             |
| 2 $\Theta$ range for data collection [°]                      | 4.002 to 52.814                                                                                 |
| Index ranges                                                  | -13 ≤ <i>h</i> ≤ 21, -23 ≤ <i>k</i> ≤ 23, -15 ≤ <i>l</i> ≤ 14                                   |
| Reflections collected                                         | 14526                                                                                           |
| Independent reflections                                       | 4049 [ <i>R</i> <sub>int</sub> = 0.0519, <i>R</i> <sub>sigma</sub> = 0.0492]                    |
| Data/restraints/parameters                                    | 4049/15/237                                                                                     |
| Goodness-of-fit on <i>F</i> <sup>2</sup>                      | 1.285                                                                                           |
| Final <i>R</i> indexes [ <i>I</i> >= 2 $\sigma$ ( <i>I</i> )] | <i>R</i> <sub>1</sub> = 0.1256<br><i>wR</i> <sub>2</sub> = 0.2648                               |
| Final <i>R</i> indexes [all data]                             | <i>R</i> <sub>1</sub> = 0.1417<br><i>wR</i> <sub>2</sub> = 0.2731                               |
| Largest diff. peak/hole [e·Å <sup>-3</sup> ]                  | 1.90/-2.51                                                                                      |



3.2. Molecular structure of  $[\text{PPh}_4]_2[\text{Mn}(\text{OTeF}_5)_4]$  (**1\***) in the solid state

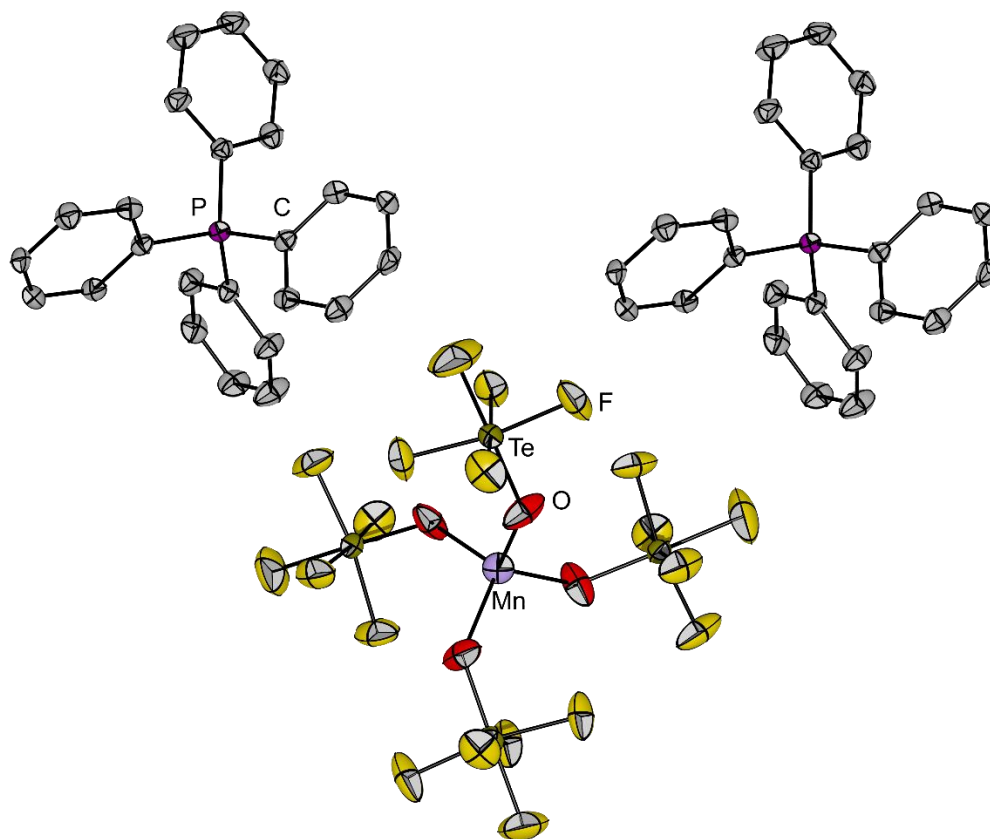

**Figure S5.** Molecular structure of  $[\text{PPh}_4]_2[\text{Mn}(\text{OTeF}_5)_4]$  (**1\***) in the solid state. Hydrogen atoms have been omitted for clarity. Displacement ellipsoids set at 50% probability.

### 3.3. Molecular structure of $[\text{NEt}_4]_2[\text{Mn}(\text{OTeF}_5)_5]$ (**2**) in the solid state

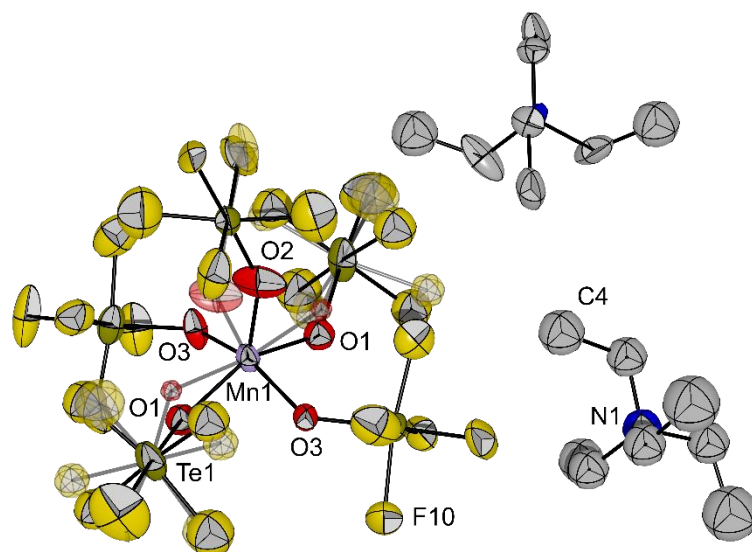

**Figure S6.** Molecular structure of  $[\text{NEt}_4]_2[\text{Mn}(\text{OTeF}_5)_5]$  (**2**) in the solid state. Hydrogen atoms have been omitted for clarity. Displacement ellipsoids set at 50% probability. The two sets of disordered O and F atoms found in the  $[\text{OTeF}_5]^-$  ligands containing O1 and O2 are shown.

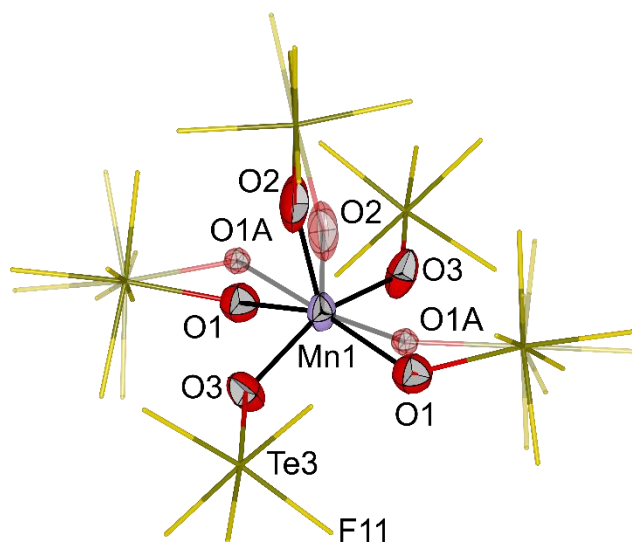

**Figure S7.** Molecular structure of the  $[\text{Mn}(\text{OTeF}_5)_5]^{2-}$  anion in the solid state as found in crystals of **2**, highlighting the coordination sphere around the Mn(III) center. Displacement ellipsoids set at 50% probability. The two sets of disordered O and F atoms found in the  $[\text{OTeF}_5]^-$  ligands containing O1 and O2 are shown.

## 4. Magnetic susceptibility measurements

Magnetic measurements were performed with a QuantumDesign MPMS3 SQUID magnetometer. The samples were prepared in a glovebox in VSM powder capsules which were sealed with a piece of Teflon tape. Both the capsules and the Teflon tape were dried in a Schlenk flask under vacuum at 110 °C for five days. A brass sample holder was used. The measurement was carried out in VSM mode from 2 K to 300 K in a magnetic field of 7 T after cooling down at zero field. A background correction was applied by subtracting the magnetic moments of an empty capsule sealed with a piece of Teflon tape using the same measurement sequence as for the sample. A diamagnetic correction was performed using Pascal's constants.<sup>10</sup> The experimental magnetic data for complex [NEt<sub>4</sub>]<sub>2</sub>[Mn(OTeF<sub>5</sub>)<sub>4</sub>] (**1**) and complex [NEt<sub>4</sub>]<sub>2</sub>[Mn(OTeF<sub>5</sub>)<sub>5</sub>] (**2**) are collected in Table S3 and Table S4, respectively. The simulation of the experimental magnetic data was performed with N. F. Chilton's PHI software (version 3.1.6)<sup>11</sup> using the following spin Hamiltonian:

$$\hat{H} = g\mu_B B_0 \hat{S} + \hat{S} D \hat{S}$$

The experimental magnetic data, together with their corresponding fits, are shown in Figure 1c and Figure 2, respectively. The fit parameters for compounds **1** and **2** are collected in Table S5).

**Table S3.** Experimental magnetic data for [NEt<sub>4</sub>]<sub>2</sub>[Mn(OTeF<sub>5</sub>)<sub>4</sub>] (**1**) obtained from the SQUID measurement.<sup>[a]</sup>

| <i>T</i> [K] | Magnetic Field [Oe] | Magnetic Moment [emu] | $\chi_{mol}$ [cm <sup>3</sup> mol <sup>-1</sup> ] | $\chi_p^{[b]}$ [cm <sup>3</sup> mol <sup>-1</sup> ] | $\mu_{eff}$ [ $\mu_B$ ] |
|--------------|---------------------|-----------------------|---------------------------------------------------|-----------------------------------------------------|-------------------------|
| 2.000        | 69999.58            | 0.24591               | 0.39131                                           | 0.39184                                             | 2.5034                  |
| 2.104        | 69999.58            | 0.24564               | 0.39087                                           | 0.39141                                             | 2.5662                  |
| 2.213        | 69999.58            | 0.24530               | 0.39033                                           | 0.39087                                             | 2.6302                  |
| 2.328        | 69999.58            | 0.24522               | 0.39021                                           | 0.39074                                             | 2.6972                  |
| 2.448        | 69999.58            | 0.24475               | 0.38945                                           | 0.38999                                             | 2.7635                  |
| 2.574        | 69999.58            | 0.24428               | 0.38872                                           | 0.38925                                             | 2.8305                  |
| 2.709        | 69999.58            | 0.24353               | 0.38752                                           | 0.38805                                             | 2.8997                  |
| 2.850        | 69999.58            | 0.24288               | 0.38648                                           | 0.38702                                             | 2.9699                  |
| 2.999        | 69999.58            | 0.24225               | 0.38548                                           | 0.38602                                             | 3.0427                  |

|        |          |         |         |         |        |
|--------|----------|---------|---------|---------|--------|
| 3.152  | 69999.58 | 0.24166 | 0.38454 | 0.38507 | 3.1157 |
| 3.314  | 69999.58 | 0.24069 | 0.38300 | 0.38353 | 3.1882 |
| 3.488  | 69999.58 | 0.23960 | 0.38126 | 0.38180 | 3.2636 |
| 3.671  | 69999.58 | 0.23861 | 0.37969 | 0.38022 | 3.3409 |
| 3.861  | 69999.58 | 0.23744 | 0.37783 | 0.37836 | 3.4181 |
| 4.062  | 69999.58 | 0.23608 | 0.37566 | 0.37619 | 3.4959 |
| 4.273  | 69999.58 | 0.23466 | 0.37341 | 0.37394 | 3.5747 |
| 4.495  | 69999.58 | 0.23313 | 0.37097 | 0.37150 | 3.6543 |
| 4.728  | 69999.58 | 0.23138 | 0.36818 | 0.36872 | 3.7340 |
| 4.974  | 69999.58 | 0.22952 | 0.36523 | 0.36576 | 3.8143 |
| 5.232  | 69999.58 | 0.22749 | 0.36199 | 0.36252 | 3.8948 |
| 5.506  | 69999.58 | 0.22536 | 0.35861 | 0.35914 | 3.9769 |
| 5.793  | 69999.58 | 0.22314 | 0.35507 | 0.35560 | 4.0590 |
| 6.090  | 69999.58 | 0.22052 | 0.35091 | 0.35144 | 4.1372 |
| 6.406  | 69999.58 | 0.21786 | 0.34667 | 0.34720 | 4.2175 |
| 6.739  | 69999.58 | 0.21507 | 0.34223 | 0.34276 | 4.2980 |
| 7.088  | 69999.58 | 0.21195 | 0.33727 | 0.33780 | 4.3760 |
| 7.457  | 69999.58 | 0.20867 | 0.33204 | 0.33257 | 4.4535 |
| 7.843  | 69999.58 | 0.20529 | 0.32667 | 0.32720 | 4.5304 |
| 8.251  | 69999.58 | 0.20166 | 0.32089 | 0.32143 | 4.6054 |
| 8.679  | 69999.58 | 0.19799 | 0.31506 | 0.31559 | 4.6804 |
| 9.125  | 69999.58 | 0.19406 | 0.30880 | 0.30933 | 4.7513 |
| 9.603  | 69999.58 | 0.18989 | 0.30216 | 0.30269 | 4.8216 |
| 10.102 | 69999.58 | 0.18560 | 0.29533 | 0.29586 | 4.8891 |
| 10.627 | 69999.58 | 0.18118 | 0.28830 | 0.28883 | 4.9545 |
| 11.178 | 69999.58 | 0.17651 | 0.28087 | 0.28140 | 5.0157 |
| 11.759 | 69999.58 | 0.17182 | 0.27341 | 0.27395 | 5.0756 |
| 12.369 | 69999.58 | 0.16693 | 0.26563 | 0.26616 | 5.1313 |
| 13.012 | 69999.58 | 0.16208 | 0.25791 | 0.25844 | 5.1859 |
| 13.688 | 69999.58 | 0.15714 | 0.25005 | 0.25058 | 5.2375 |
| 14.398 | 69999.58 | 0.15222 | 0.24222 | 0.24275 | 5.2870 |
| 15.146 | 69999.58 | 0.14728 | 0.23436 | 0.23489 | 5.3341 |
| 15.931 | 69999.58 | 0.14242 | 0.22663 | 0.22716 | 5.3798 |
| 16.759 | 69999.58 | 0.13751 | 0.21881 | 0.21935 | 5.4220 |
| 17.629 | 69999.58 | 0.13255 | 0.21091 | 0.21144 | 5.4599 |

|         |          |         |         |         |        |
|---------|----------|---------|---------|---------|--------|
| 18.543  | 69999.58 | 0.12768 | 0.20317 | 0.20370 | 5.4963 |
| 19.506  | 69999.58 | 0.12288 | 0.19553 | 0.19607 | 5.5305 |
| 20.518  | 69999.58 | 0.11814 | 0.18798 | 0.18852 | 5.5619 |
| 21.584  | 69999.58 | 0.11344 | 0.18051 | 0.18104 | 5.5902 |
| 22.704  | 69999.58 | 0.10895 | 0.17337 | 0.17390 | 5.6193 |
| 23.883  | 69999.58 | 0.10444 | 0.16619 | 0.16672 | 5.6432 |
| 25.123  | 69999.58 | 0.10009 | 0.15927 | 0.15980 | 5.6663 |
| 26.427  | 69999.58 | 0.09588 | 0.15257 | 0.15310 | 5.6884 |
| 27.799  | 69999.58 | 0.09176 | 0.14602 | 0.14655 | 5.7081 |
| 29.242  | 69999.58 | 0.08775 | 0.13963 | 0.14016 | 5.7253 |
| 30.760  | 69999.58 | 0.08388 | 0.13348 | 0.13401 | 5.7417 |
| 32.357  | 69999.58 | 0.08012 | 0.12749 | 0.12802 | 5.7559 |
| 34.037  | 69999.58 | 0.07656 | 0.12182 | 0.12235 | 5.7712 |
| 35.804  | 69999.58 | 0.07307 | 0.11627 | 0.11680 | 5.7832 |
| 37.663  | 69999.58 | 0.06971 | 0.11092 | 0.11146 | 5.7941 |
| 39.620  | 69999.58 | 0.06650 | 0.10582 | 0.10635 | 5.8051 |
| 41.674  | 69999.58 | 0.06341 | 0.10090 | 0.10144 | 5.8145 |
| 43.837  | 69999.58 | 0.06044 | 0.09618 | 0.09671 | 5.8229 |
| 46.112  | 69999.58 | 0.05760 | 0.09166 | 0.09219 | 5.8307 |
| 48.505  | 69999.58 | 0.05488 | 0.08732 | 0.08785 | 5.8378 |
| 51.023  | 69999.58 | 0.05229 | 0.08320 | 0.08374 | 5.8455 |
| 53.671  | 69999.58 | 0.04979 | 0.07923 | 0.07977 | 5.8513 |
| 56.456  | 69999.58 | 0.04746 | 0.07552 | 0.07605 | 5.8598 |
| 59.385  | 69999.58 | 0.04518 | 0.07189 | 0.07243 | 5.8650 |
| 62.468  | 69999.58 | 0.04295 | 0.06835 | 0.06888 | 5.8663 |
| 65.711  | 69999.58 | 0.04078 | 0.06489 | 0.06542 | 5.8634 |
| 69.120  | 69999.58 | 0.03873 | 0.06163 | 0.06216 | 5.8619 |
| 72.704  | 69999.58 | 0.03695 | 0.05880 | 0.05933 | 5.8735 |
| 76.477  | 69999.58 | 0.03529 | 0.05615 | 0.05668 | 5.8881 |
| 80.447  | 69999.58 | 0.03359 | 0.05345 | 0.05399 | 5.8936 |
| 84.620  | 69999.58 | 0.03193 | 0.05081 | 0.05135 | 5.8948 |
| 89.009  | 69999.58 | 0.03032 | 0.04825 | 0.04878 | 5.8927 |
| 93.628  | 69999.58 | 0.02886 | 0.04592 | 0.04645 | 5.8979 |
| 98.490  | 69999.58 | 0.02743 | 0.04365 | 0.04418 | 5.8992 |
| 103.600 | 69999.58 | 0.02609 | 0.04152 | 0.04205 | 5.9024 |

|         |          |         |         |         |        |
|---------|----------|---------|---------|---------|--------|
| 108.978 | 69999.58 | 0.02480 | 0.03946 | 0.03999 | 5.9036 |
| 114.633 | 69999.58 | 0.02357 | 0.03750 | 0.03803 | 5.9050 |
| 120.583 | 69999.58 | 0.02238 | 0.03561 | 0.03614 | 5.9035 |
| 126.845 | 69999.58 | 0.02127 | 0.03385 | 0.03438 | 5.9056 |
| 133.434 | 69999.58 | 0.02017 | 0.03210 | 0.03264 | 5.9014 |
| 140.360 | 69999.58 | 0.01918 | 0.03051 | 0.03105 | 5.9035 |
| 147.642 | 69999.58 | 0.01823 | 0.02900 | 0.02954 | 5.9056 |
| 155.313 | 69999.58 | 0.01729 | 0.02752 | 0.02805 | 5.9027 |
| 163.376 | 69999.58 | 0.01642 | 0.02613 | 0.02666 | 5.9026 |
| 171.856 | 69999.58 | 0.01562 | 0.02485 | 0.02538 | 5.9064 |
| 180.783 | 69999.58 | 0.01480 | 0.02355 | 0.02408 | 5.9006 |
| 190.171 | 69999.58 | 0.01404 | 0.02235 | 0.02288 | 5.8991 |
| 200.054 | 69999.58 | 0.01332 | 0.02120 | 0.02173 | 5.8970 |
| 210.433 | 69999.58 | 0.01265 | 0.02012 | 0.02065 | 5.8957 |
| 221.362 | 69999.58 | 0.01200 | 0.01909 | 0.01962 | 5.8938 |
| 232.858 | 69999.58 | 0.01137 | 0.01809 | 0.01862 | 5.8890 |
| 244.951 | 69999.58 | 0.01078 | 0.01715 | 0.01768 | 5.8854 |
| 257.667 | 69999.58 | 0.01021 | 0.01624 | 0.01677 | 5.8791 |
| 271.053 | 69999.58 | 0.00966 | 0.01537 | 0.01590 | 5.8714 |
| 285.126 | 69999.58 | 0.00914 | 0.01454 | 0.01508 | 5.8632 |
| 299.969 | 69999.58 | 0.00868 | 0.01381 | 0.01434 | 5.8655 |

[a]  $m = 11.4$  mg [b]  $\chi_p$  = molar magnetic susceptibility after correction for the diamagnetism of the sample ( $\chi_{dia} = -531.94 \cdot 10^{-6} \text{ cm}^3 \text{ mol}^{-1}$ , calculated according to Ref. 10).

**Table S4.** Experimental magnetic data for  $[\text{NEt}_4]_2[\text{Mn}(\text{OTeF}_5)_5]$  (**2**) obtained from the SQUID measurement.<sup>[a]</sup>

| $T$ [K] | Magnetic Field [Oe] | Magnetic Moment [emu] | $\chi_{mol}$ [ $\text{cm}^3 \text{ mol}^{-1}$ ] | $\chi_p^{[b]}$ [ $\text{cm}^3 \text{ mol}^{-1}$ ] | $\mu_{eff}$ [ $\mu_B$ ] |
|---------|---------------------|-----------------------|-------------------------------------------------|---------------------------------------------------|-------------------------|
| 2.000   | 69999.62            | 0.15427               | 0.32274                                         | 0.32335                                           | 2.2740                  |
| 2.104   | 69999.62            | 0.15415               | 0.32250                                         | 0.32310                                           | 2.3319                  |
| 2.213   | 69999.62            | 0.15388               | 0.32194                                         | 0.32254                                           | 2.3893                  |
| 2.328   | 69999.62            | 0.15377               | 0.32170                                         | 0.32230                                           | 2.4498                  |
| 2.449   | 69999.62            | 0.15364               | 0.32144                                         | 0.32204                                           | 2.5113                  |
| 2.576   | 69999.62            | 0.15335               | 0.32082                                         | 0.32142                                           | 2.5734                  |

|        |          |         |         |         |        |
|--------|----------|---------|---------|---------|--------|
| 2.710  | 69999.62 | 0.15311 | 0.32031 | 0.32092 | 2.6371 |
| 2.850  | 69999.62 | 0.15279 | 0.31965 | 0.32025 | 2.7019 |
| 2.999  | 69999.62 | 0.15251 | 0.31907 | 0.31967 | 2.7687 |
| 3.154  | 69999.62 | 0.15211 | 0.31823 | 0.31883 | 2.8357 |
| 3.318  | 69999.62 | 0.15181 | 0.31759 | 0.31819 | 2.9056 |
| 3.490  | 69999.62 | 0.15126 | 0.31646 | 0.31706 | 2.9748 |
| 3.671  | 69999.62 | 0.15069 | 0.31526 | 0.31586 | 3.0453 |
| 3.862  | 69999.62 | 0.16073 | 0.33626 | 0.33686 | 3.2256 |
| 4.062  | 69999.62 | 0.14969 | 0.31317 | 0.31377 | 3.1927 |
| 4.273  | 69999.62 | 0.14903 | 0.31180 | 0.31240 | 3.2674 |
| 4.495  | 69999.62 | 0.14830 | 0.31025 | 0.31085 | 3.3429 |
| 4.728  | 69999.62 | 0.14746 | 0.30850 | 0.30910 | 3.4187 |
| 4.974  | 69999.62 | 0.14649 | 0.30647 | 0.30708 | 3.4949 |
| 5.232  | 69999.62 | 0.14557 | 0.30455 | 0.30515 | 3.5733 |
| 5.503  | 69999.62 | 0.14445 | 0.30221 | 0.30282 | 3.6507 |
| 5.789  | 69999.62 | 0.14329 | 0.29979 | 0.30039 | 3.7293 |
| 6.090  | 69999.62 | 0.14185 | 0.29677 | 0.29737 | 3.8059 |
| 6.406  | 69999.62 | 0.14038 | 0.29369 | 0.29429 | 3.8829 |
| 6.738  | 69999.62 | 0.13886 | 0.29052 | 0.29112 | 3.9609 |
| 7.089  | 69999.62 | 0.13719 | 0.28702 | 0.28763 | 4.0380 |
| 7.456  | 69999.62 | 0.13535 | 0.28316 | 0.28376 | 4.1135 |
| 7.809  | 69999.62 | 0.13345 | 0.27919 | 0.27979 | 4.1803 |
| 8.250  | 69999.62 | 0.13115 | 0.27437 | 0.27497 | 4.2595 |
| 8.679  | 69999.62 | 0.12894 | 0.26975 | 0.27035 | 4.3318 |
| 9.129  | 69999.62 | 0.12650 | 0.26466 | 0.26526 | 4.4008 |
| 9.604  | 69999.62 | 0.12395 | 0.25932 | 0.25992 | 4.4681 |
| 10.102 | 69999.62 | 0.12129 | 0.25376 | 0.25436 | 4.5333 |
| 10.627 | 69999.62 | 0.11850 | 0.24792 | 0.24852 | 4.5959 |
| 11.178 | 69999.62 | 0.11555 | 0.24174 | 0.24234 | 4.6546 |
| 11.759 | 69999.62 | 0.11258 | 0.23552 | 0.23612 | 4.7123 |
| 12.369 | 69999.62 | 0.10937 | 0.22881 | 0.22941 | 4.7638 |
| 13.012 | 69999.62 | 0.10626 | 0.22231 | 0.22292 | 4.8164 |
| 13.688 | 69999.62 | 0.10302 | 0.21552 | 0.21612 | 4.8640 |
| 14.398 | 69999.62 | 0.09983 | 0.20885 | 0.20945 | 4.9110 |
| 15.147 | 69999.62 | 0.09657 | 0.20204 | 0.20264 | 4.9546 |

|        |          |         |         |         |        |
|--------|----------|---------|---------|---------|--------|
| 15.931 | 69999.62 | 0.09330 | 0.19520 | 0.19580 | 4.9947 |
| 16.759 | 69999.62 | 0.09008 | 0.18845 | 0.18905 | 5.0337 |
| 17.628 | 69999.62 | 0.08679 | 0.18158 | 0.18218 | 5.0680 |
| 18.543 | 69999.62 | 0.08353 | 0.17476 | 0.17536 | 5.0996 |
| 19.506 | 69999.62 | 0.08032 | 0.16804 | 0.16864 | 5.1291 |
| 20.518 | 69999.62 | 0.07716 | 0.16142 | 0.16202 | 5.1562 |
| 21.584 | 69999.62 | 0.07407 | 0.15497 | 0.15557 | 5.1821 |
| 22.705 | 69999.62 | 0.07100 | 0.14854 | 0.14915 | 5.2040 |
| 23.883 | 69999.62 | 0.06802 | 0.14231 | 0.14291 | 5.2247 |
| 25.123 | 69999.62 | 0.06517 | 0.13635 | 0.13695 | 5.2457 |
| 26.427 | 69999.62 | 0.06235 | 0.13044 | 0.13104 | 5.2627 |
| 27.799 | 69999.62 | 0.05964 | 0.12477 | 0.12537 | 5.2795 |
| 29.242 | 69999.62 | 0.05699 | 0.11922 | 0.11982 | 5.2936 |
| 30.760 | 69999.62 | 0.05443 | 0.11387 | 0.11448 | 5.3068 |
| 32.357 | 69999.62 | 0.05199 | 0.10878 | 0.10938 | 5.3203 |
| 34.037 | 69999.62 | 0.04966 | 0.10388 | 0.10449 | 5.3332 |
| 35.804 | 69999.62 | 0.04732 | 0.09899 | 0.09959 | 5.3402 |
| 37.663 | 69999.62 | 0.04517 | 0.09449 | 0.09509 | 5.3520 |
| 39.618 | 69999.62 | 0.04309 | 0.09015 | 0.09075 | 5.3624 |
| 41.674 | 69999.62 | 0.04105 | 0.08588 | 0.08648 | 5.3689 |
| 43.838 | 69999.62 | 0.03912 | 0.08185 | 0.08245 | 5.3766 |
| 46.113 | 69999.62 | 0.03728 | 0.07800 | 0.07860 | 5.3839 |
| 48.506 | 69999.62 | 0.03549 | 0.07425 | 0.07485 | 5.3886 |
| 51.022 | 69999.62 | 0.03377 | 0.07065 | 0.07125 | 5.3919 |
| 53.670 | 69999.62 | 0.03218 | 0.06733 | 0.06793 | 5.4000 |
| 56.459 | 69999.62 | 0.03067 | 0.06416 | 0.06476 | 5.4076 |
| 59.388 | 69999.62 | 0.02921 | 0.06111 | 0.06171 | 5.4139 |
| 62.468 | 69999.62 | 0.02773 | 0.05801 | 0.05861 | 5.4114 |
| 65.712 | 69999.62 | 0.02635 | 0.05514 | 0.05574 | 5.4122 |
| 69.125 | 69999.62 | 0.02502 | 0.05235 | 0.05296 | 5.4107 |
| 72.710 | 69999.62 | 0.02389 | 0.04998 | 0.05058 | 5.4234 |
| 76.486 | 69999.62 | 0.02279 | 0.04768 | 0.04828 | 5.4345 |
| 80.454 | 69999.62 | 0.02170 | 0.04539 | 0.04599 | 5.4400 |
| 84.629 | 69999.62 | 0.02062 | 0.04314 | 0.04374 | 5.4411 |
| 89.021 | 69999.62 | 0.01958 | 0.04097 | 0.04157 | 5.4404 |



|         |          |         |         |         |        |
|---------|----------|---------|---------|---------|--------|
| 93.637  | 69999.62 | 0.01863 | 0.03898 | 0.03958 | 5.4443 |
| 98.488  | 69999.62 | 0.01770 | 0.03703 | 0.03763 | 5.4444 |
| 103.600 | 69999.62 | 0.01686 | 0.03527 | 0.03587 | 5.4519 |
| 108.977 | 69999.62 | 0.01645 | 0.03442 | 0.03502 | 5.5245 |
| 114.635 | 69999.62 | 0.01521 | 0.03182 | 0.03242 | 5.4520 |
| 120.600 | 69999.62 | 0.01448 | 0.03028 | 0.03089 | 5.4580 |
| 126.843 | 69999.62 | 0.01375 | 0.02877 | 0.02937 | 5.4587 |
| 133.445 | 69999.62 | 0.01303 | 0.02725 | 0.02785 | 5.4520 |
| 140.361 | 69999.62 | 0.01239 | 0.02592 | 0.02652 | 5.4563 |
| 147.651 | 69999.62 | 0.01209 | 0.02529 | 0.02589 | 5.5291 |
| 155.317 | 69999.62 | 0.01115 | 0.02332 | 0.02392 | 5.4510 |
| 163.373 | 69999.62 | 0.01064 | 0.02225 | 0.02285 | 5.4644 |
| 171.858 | 69999.62 | 0.01013 | 0.02118 | 0.02179 | 5.4720 |
| 180.781 | 69999.62 | 0.00957 | 0.02001 | 0.02061 | 5.4593 |
| 190.187 | 69999.62 | 0.00909 | 0.01901 | 0.01961 | 5.4612 |
| 200.043 | 69999.62 | 0.00863 | 0.01805 | 0.01866 | 5.4632 |
| 210.431 | 69999.62 | 0.00820 | 0.01716 | 0.01776 | 5.4669 |
| 221.364 | 69999.62 | 0.00778 | 0.01627 | 0.01687 | 5.4646 |
| 232.857 | 69999.62 | 0.00737 | 0.01541 | 0.01601 | 5.4610 |
| 244.951 | 69999.62 | 0.00701 | 0.01466 | 0.01526 | 5.4675 |
| 257.673 | 69999.62 | 0.00665 | 0.01392 | 0.01452 | 5.4699 |
| 271.047 | 69999.62 | 0.00632 | 0.01322 | 0.01382 | 5.4735 |
| 285.135 | 69999.62 | 0.00597 | 0.01250 | 0.01310 | 5.4657 |
| 299.932 | 69999.62 | 0.00569 | 0.01190 | 0.01251 | 5.4772 |

[a]  $m = 10.3$  mg [b]  $\chi_p$  = molar magnetic susceptibility after correction for the diamagnetism of the sample ( $\chi_{dia} = -601.34 \cdot 10^{-6} \text{ cm}^3 \text{ mol}^{-1}$ , calculated according to Ref. 10).

**Table S5.** Fit parameters for compounds  $[\text{NEt}_4]_2[\text{Mn}(\text{OTeF}_5)_4]$  (**1**) and  $[\text{NEt}_4]_2[\text{Mn}(\text{OTeF}_5)_5]$  (**2**).

|                             |                          | <b>1</b>     | <b>2</b>     |
|-----------------------------|--------------------------|--------------|--------------|
| <b>Average g-factor</b>     | $g_{\text{avg}}$         | <b>1.995</b> | <b>2.223</b> |
|                             | error                    | 0.0003       | 0.001        |
| <b>Zero-field splitting</b> | $D$ [ $\text{cm}^{-1}$ ] | <b>0.62</b>  | <b>2.15</b>  |
|                             | error                    | 0.03         | 0.03         |

## 5. EPR spectra

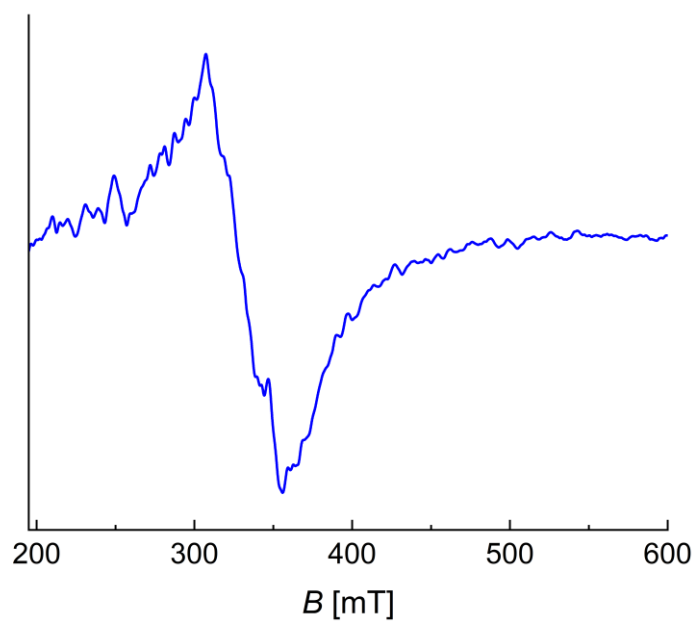

**Figure S8.** X-band EPR spectrum of  $[\text{NEt}_4]_2[\text{Mn}(\text{OTeF}_5)_4]$  (**1**) in  $\text{CH}_2\text{Cl}_2$  (1.0 mM) at 293 K.

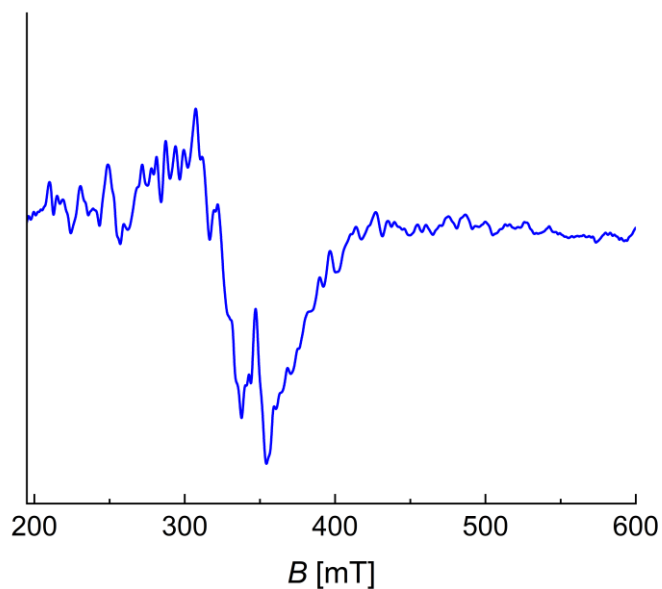

**Figure S9.** X-band EPR spectrum of  $[\text{NEt}_4]_2[\text{Mn}(\text{OTeF}_5)_4]$  (**1**) in  $\text{CH}_2\text{Cl}_2$  (0.5 mM) at 293 K.

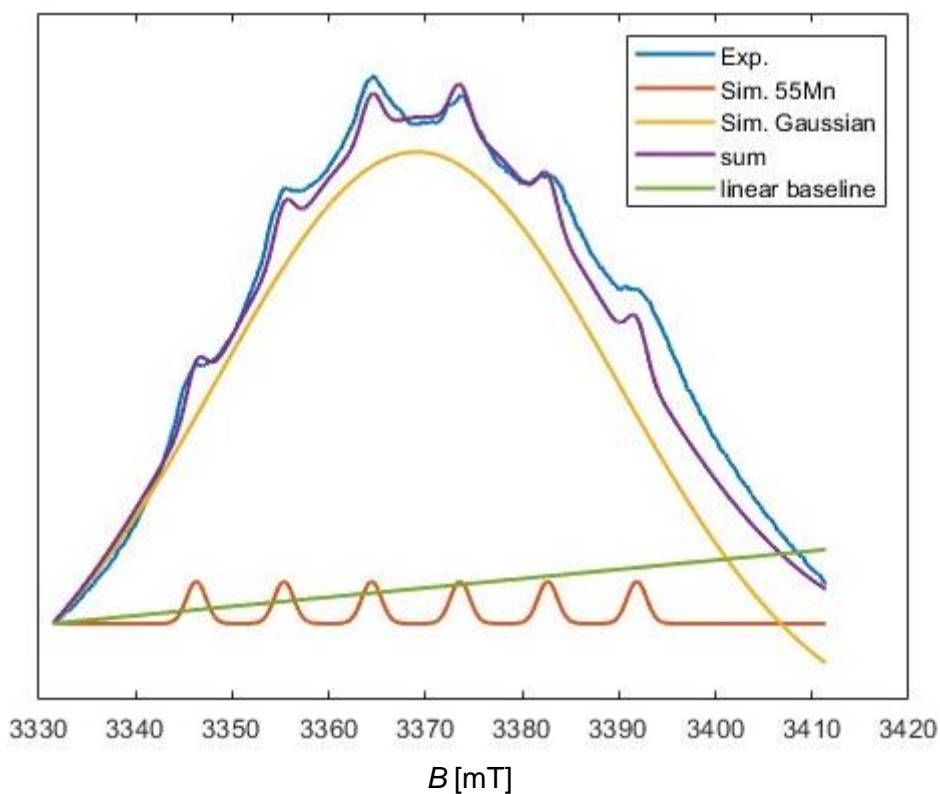

**Figure S10.** W-band field swept echo EPR spectrum of  $[\text{NEt}_4]_2[\text{Mn}(\text{OTeF}_5)_4]$  (**1**) in  $\text{CH}_2\text{Cl}_2$  (1.0 mM) at 20 K and simulation of the central  $m_s = -1/2 \rightarrow m_s = +1/2$  transition, neglecting the zero-field splitting ( $g_{iso} = 2.00$ ,  $A(^{55}\text{Mn}) = 255$  MHz, peak-to-peak linewidth = 2 mT). The substantial broadening of a major part of the spectrum is addressed by a Gaussian line (lw 0.49 mT).

## 6. Quantum-chemical calculations

### 6.1. Computational details

Density Functional Theory (DFT) calculations were performed by using the Gaussian 16 program suite.<sup>12</sup> Geometry optimizations were carried out by means of B3LYP<sup>13</sup> (in conjunction with D3BJ dispersion correction scheme<sup>14, 15</sup>), TPSSh,<sup>16-18</sup> M06<sup>19</sup> and M06-L<sup>20</sup> exchange-correlation functionals. In all cases, the triple-zeta def2-TZVP Ahlrichs basis set was employed,<sup>21</sup> in conjunction with an ultrafine integration grid. The nature of stationary points was confirmed by analytical frequency analysis.

Multi-reference calculations on  $[\text{Mn}(\text{OTeF}_5)_4]^{2-}$  and  $[\text{Mn}(\text{OTeF}_5)_5]^{2-}$  structures were performed by means of the ORCA 5.0 package,<sup>22, 23</sup> and considering the B3LYP-optimized geometry. def2-TZVP basis set was used in both CASSCF and NEVPT2 calculations (Refs. 51–54 in the main text), in which we also applied the resolution of identity (RI) approximation to speed up the calculations, in conjunction with def2/JK auxiliary basis set.<sup>24</sup> Strongly contracted NEVPT2 calculations were performed on top of the SA-CASSCF wavefunction to account for dynamic correlation effects. In the active space, we included the Mn–O bonding orbitals based on the 3d orbitals, along with the primarily 3d orbitals of the metal and the corresponding 4d orbitals, to consider the double-d shell correlation effects. This way, for  $[\text{Mn}(\text{OTeF}_5)_4]^{2-}$ , the active space is composed by 11 electrons and 13 molecular orbitals CAS(11,13), and is shown in Figure S8. In the state average (SA), we included 1 sextet, 15 quartets and 10 doublet states, which, in a hypothetically perfect tetrahedral geometry, would correspond to the following terms:  ${}^6\text{A}_1$ ,  ${}^4\text{T}_1$ ,  ${}^4\text{T}_2$ ,  ${}^4\text{E}(\text{G})$ ,  ${}^4\text{A}_1$ ,  ${}^4\text{T}_2$ ,  ${}^4\text{E}(\text{D})$ ,  ${}^4\text{A}_2$ ,  ${}^2\text{T}_2$ ,  ${}^2\text{T}_1$ ,  ${}^2\text{A}_2$ ,  ${}^2\text{E}$  and  ${}^2\text{A}_1$ . The active space for calculations in  $[\text{Mn}(\text{OTeF}_5)_5]^{2-}$  is composed by 12 electrons and 14 molecular orbitals CAS(12,14), and is shown in Figure S9. In the SA we included 5 quintets, 12 triplets and 5 singlets.

Interacting Quantum Atoms (IQA) calculations were performed using the PROMOLDEN code.<sup>25</sup> Molecular orbital representations were made by using VESTA.<sup>26</sup>

## 6.2. Active space molecular orbitals

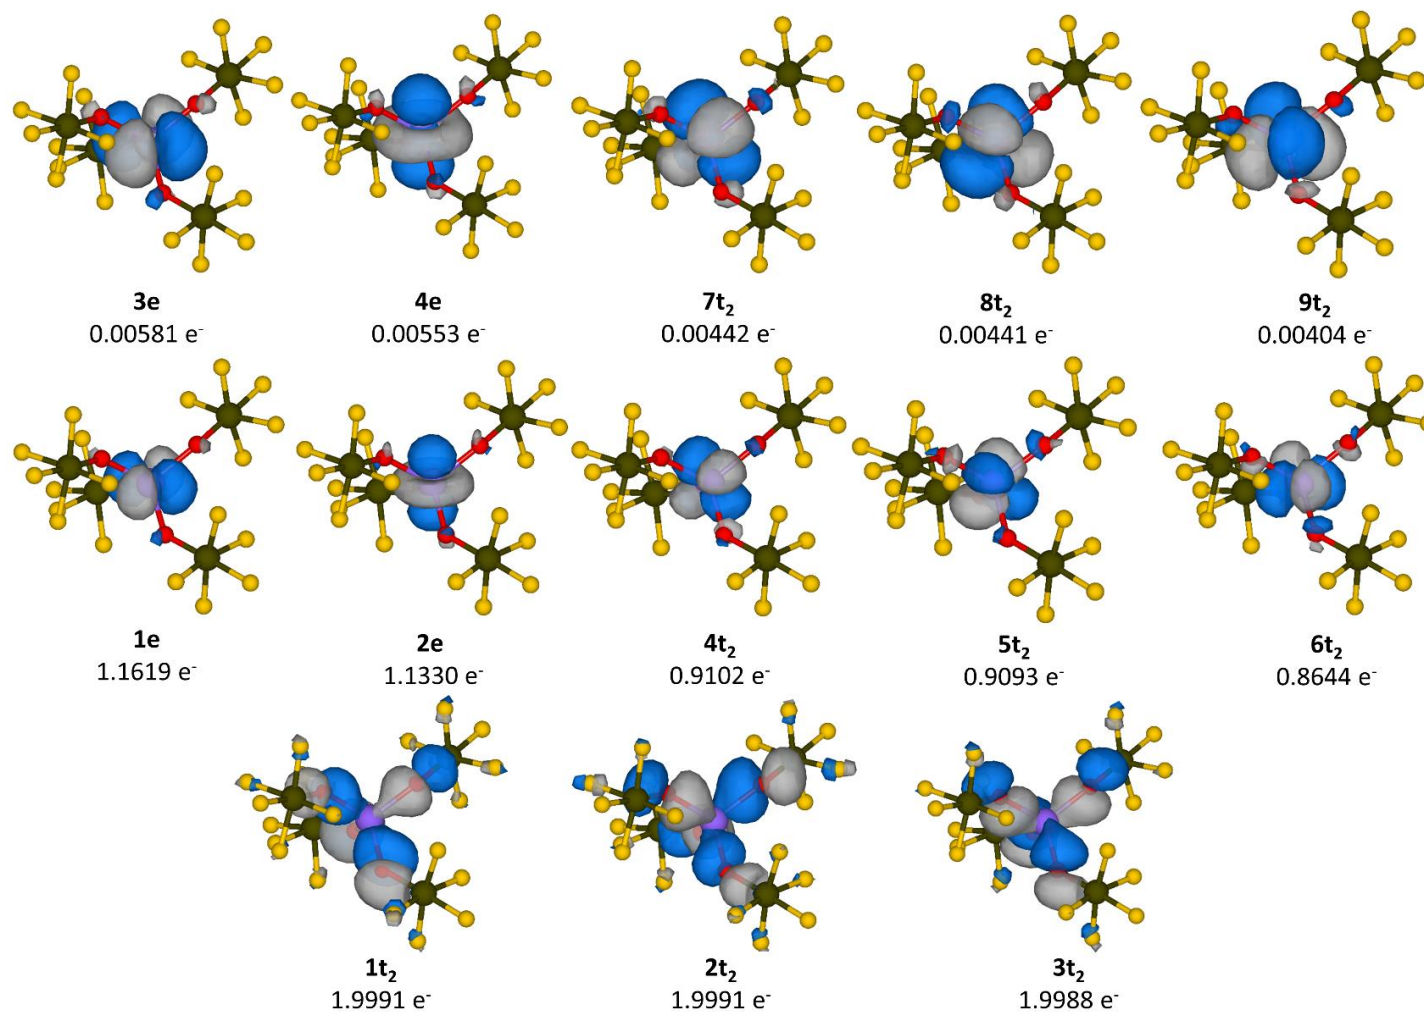

**Figure S11.** Active space orbitals included in SA-CASSCF(11,13) calculations on  $[\text{Mn}(\text{OTeF}_5)_4]^{2-}$ . For the sake of simplicity, the orbital nomenclature is based on a hypothetical tetrahedral structure. The state-average natural population of the various orbitals is also provided. Orbital isosurfaces given at 0.025 au.

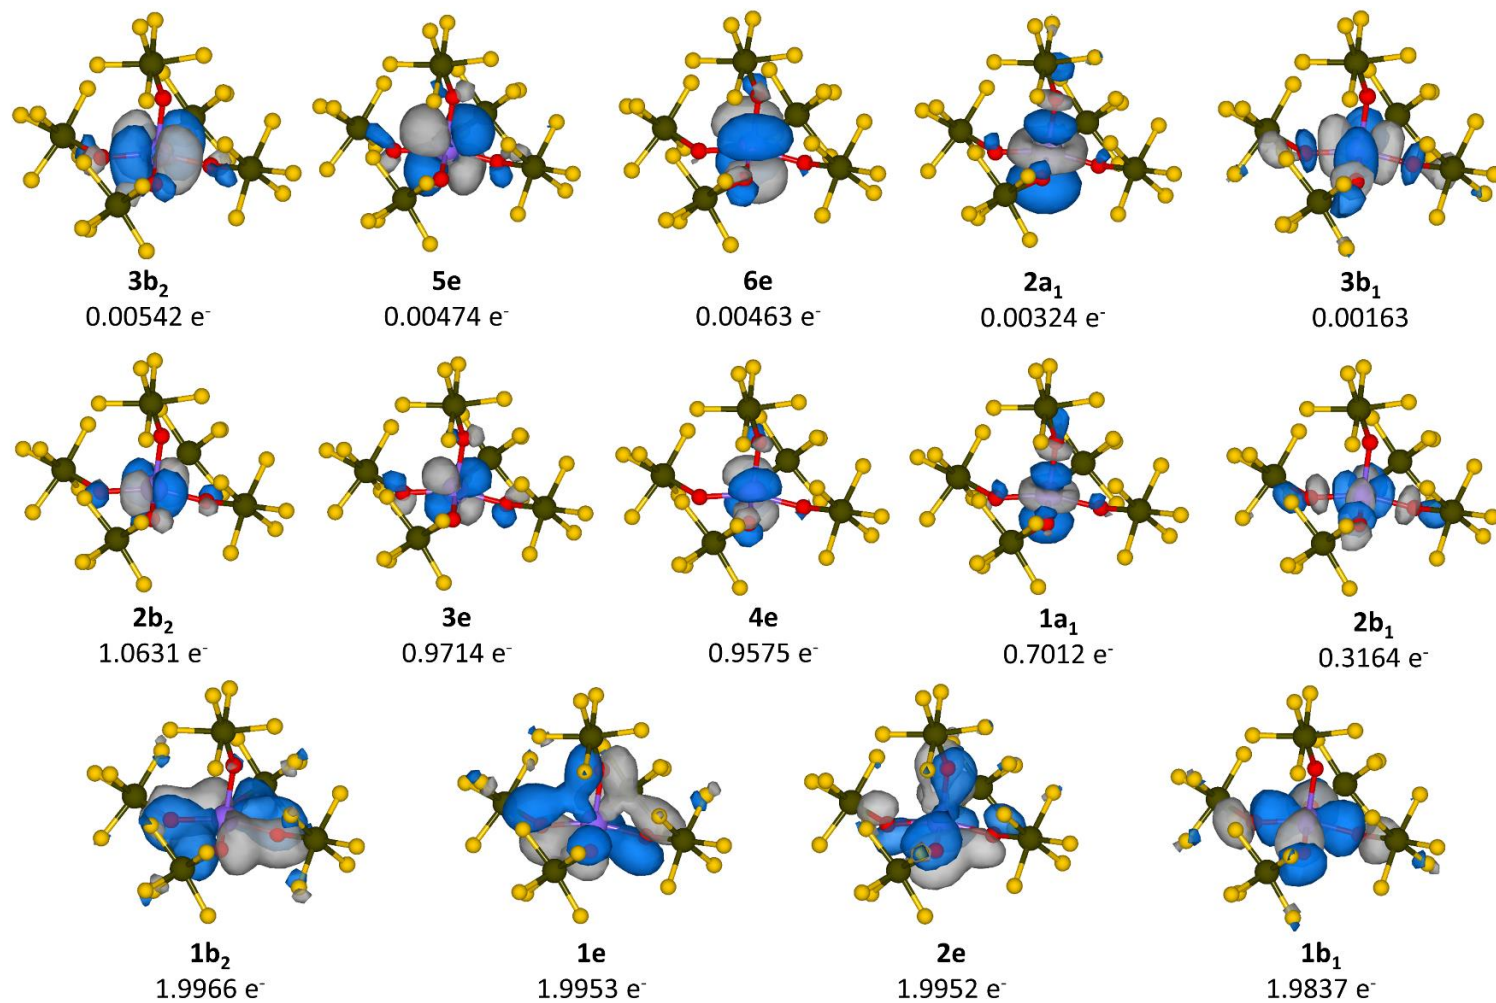

**Figure S12.** Active space orbitals included in SA-CASSCF(12,14) calculations on  $[\text{Mn}(\text{OTeF}_5)_5]^{2-}$ . The orbital nomenclature is based on a hypothetical square-pyramidal structure. The state-average natural population of the various orbitals is also provided. Orbital isosurfaces given at 0.025 au.

### 6.3. States composition and energy difference

**Table S6.** SA-CASSCF(11,13)/NEVPT2 states, weights for the most relevant configurations (up to five), and energy difference for the various electronic states computed for  $[\text{Mn}(\text{OTeF}_5)_4]^{2-}$ .

| State | Root | Mult. | CI-vector         |               | $E_{\text{NEVPT2}}$<br>(au) | $\Delta E_{\text{NEVPT2}}$ |                      |                  |
|-------|------|-------|-------------------|---------------|-----------------------------|----------------------------|----------------------|------------------|
|       |      |       | 3d <sup>[a]</sup> | Weight<br>(%) |                             | eV                         | kJ mol <sup>-1</sup> | cm <sup>-1</sup> |
| 0     | 0    | 6     | 11111             | 98.8          | -4515.68340                 | 0.00                       | 0.0                  | 0                |
| 1     | 0    | 4     | 21110             | 90.0          | -4515.57440                 | 2.97                       | 286.1                | 23919            |
|       |      |       | 01112             | 6.0           |                             |                            |                      |                  |
|       |      |       | 11201             | 1.3           |                             |                            |                      |                  |
|       |      |       | 11021             | 1.2           |                             |                            |                      |                  |
| 2     | 1    | 4     | 12101             | 56.1          | -4515.56847                 | 3.13                       | 301.7                | 25221            |
|       |      |       | 21101             | 26.4          |                             |                            |                      |                  |
|       |      |       | 10121             | 5.3           |                             |                            |                      |                  |
|       |      |       | 01121             | 3.5           |                             |                            |                      |                  |
|       |      |       | 11210             | 3.4           |                             |                            |                      |                  |
| 3     | 2    | 4     | 12011             | 57.0          | -4515.56839                 | 3.13                       | 301.9                | 25238            |
|       |      |       | 21011             | 25.3          |                             |                            |                      |                  |
|       |      |       | 10211             | 5.4           |                             |                            |                      |                  |
|       |      |       | 01211             | 3.4           |                             |                            |                      |                  |
|       |      |       | 11120             | 3.3           |                             |                            |                      |                  |
| 4     | 3    | 4     | 12110             | 34.3          | -4515.56400                 | 3.25                       | 313.4                | 26201            |
|       |      |       | 11201             | 21.7          |                             |                            |                      |                  |
|       |      |       | 11021             | 21.6          |                             |                            |                      |                  |
|       |      |       | 10112             | 13.4          |                             |                            |                      |                  |
|       |      |       | 11111             | 7.4           |                             |                            |                      |                  |
| 5     | 4    | 4     | 11210             | 24.5          | -4515.56326                 | 3.27                       | 315.4                | 26364            |
|       |      |       | 11012             | 20.0          |                             |                            |                      |                  |
|       |      |       | 12101             | 16.0          |                             |                            |                      |                  |
|       |      |       | 21101             | 13.9          |                             |                            |                      |                  |
|       |      |       | 10121             | 7.2           |                             |                            |                      |                  |
| 6     | 5    | 4     | 11120             | 24.5          | -4515.56325                 | 3.27                       | 315.4                | 26366            |
|       |      |       | 11102             | 20.1          |                             |                            |                      |                  |
|       |      |       | 12011             | 15.6          |                             |                            |                      |                  |
|       |      |       | 21011             | 14.3          |                             |                            |                      |                  |
|       |      |       | 10211             | 7.0           |                             |                            |                      |                  |
| 7     | 6    | 4     | 11111             | 98.6          | -4515.56087                 | 3.33                       | 321.7                | 26889            |
| 8     | 7    | 4     | 11111             | 48.9          | -4515.56031                 | 3.35                       | 323.1                | 27012            |
|       |      |       | 20111             | 21.4          |                             |                            |                      |                  |
|       |      |       | 02111             | 20.2          |                             |                            |                      |                  |
|       |      |       | 11201             | 4.1           |                             |                            |                      |                  |
| 9     | 8    | 4     | 11111             | 98.6          | -4515.56030                 | 3.35                       | 323.2                | 27014            |

|    |    |   |                                           |                                      |             |      |       |       |
|----|----|---|-------------------------------------------|--------------------------------------|-------------|------|-------|-------|
| 10 | 9  | 4 | 10211<br>01121<br>11210<br>01211<br>11120 | 23.7<br>16.9<br>13.9<br>11.9<br>10.0 | -4515.54018 | 3.90 | 376.0 | 31429 |
| 11 | 10 | 4 | 10121<br>01211<br>11120<br>01121<br>11210 | 23.0<br>16.5<br>13.6<br>12.4<br>10.2 | -4515.54014 | 3.90 | 376.1 | 31438 |
| 12 | 11 | 4 | 12110<br>11201<br>11021<br>10112<br>11111 | 41.3<br>20.8<br>20.2<br>9.6<br>6.4   | -4515.54007 | 3.90 | 376.3 | 31453 |
| 13 | 12 | 4 | 11102<br>21011<br>10211<br>10121<br>11120 | 28.0<br>26.0<br>16.8<br>10.1<br>9.2  | -4515.53761 | 3.97 | 382.7 | 31992 |
| 14 | 13 | 4 | 11012<br>21101<br>10121<br>10211<br>11210 | 28.2<br>25.6<br>17.6<br>10.0<br>8.7  | -4515.53758 | 3.97 | 382.8 | 32000 |
| 15 | 14 | 4 | 01112<br>11021<br>11201<br>21110          | 74.5<br>11.4<br>10.5<br>2.1          | -4515.53388 | 4.07 | 392.5 | 32812 |
| 16 | 0  | 2 | 22100<br>20120<br>22010<br>21011<br>02102 | 61.9<br>6.6<br>6.6<br>5.1<br>3.7     | -4515.52103 | 4.42 | 426.3 | 35633 |
| 17 | 1  | 2 | 22010<br>20210<br>22100<br>21101<br>02012 | 61.6<br>6.8<br>6.5<br>5.1<br>3.7     | -4515.52096 | 4.42 | 426.4 | 35648 |
| 18 | 2  | 2 | 22001<br>12110<br>00221<br>02021<br>02201 | 62.6<br>13.4<br>3.0<br>2.8<br>2.7    | -4515.51728 | 4.52 | 436.1 | 36454 |



|    |   |   |       |      |             |      |       |       |
|----|---|---|-------|------|-------------|------|-------|-------|
| 19 | 3 | 2 | 21110 | 74.6 | -4515.51509 | 4.58 | 441.9 | 36936 |
|    |   |   | 01112 | 9.5  |             |      |       |       |
|    |   |   | 12110 | 4.2  |             |      |       |       |
|    |   |   | 10112 | 1.5  |             |      |       |       |
|    |   |   | 20021 | 1.3  |             |      |       |       |
| 20 | 4 | 2 | 21200 | 23.6 | -4515.51566 | 4.56 | 440.3 | 36810 |
|    |   |   | 21020 | 22.9 |             |      |       |       |
|    |   |   | 12002 | 10.7 |             |      |       |       |
|    |   |   | 21110 | 9.8  |             |      |       |       |
|    |   |   | 11111 | 8.2  |             |      |       |       |
| 21 | 5 | 2 | 21110 | 48.2 | -4515.51231 | 4.66 | 449.1 | 37546 |
|    |   |   | 11201 | 13.5 |             |      |       |       |
|    |   |   | 11021 | 13.4 |             |      |       |       |
|    |   |   | 01112 | 6.7  |             |      |       |       |
|    |   |   | 11111 | 4.4  |             |      |       |       |
| 22 | 6 | 2 | 12101 | 49.1 | -4515.51048 | 4.71 | 453.9 | 37946 |
|    |   |   | 21101 | 22.3 |             |      |       |       |
|    |   |   | 10121 | 10.5 |             |      |       |       |
|    |   |   | 01121 | 5.0  |             |      |       |       |
|    |   |   | 21011 | 3.1  |             |      |       |       |
| 23 | 7 | 2 | 12011 | 49.6 | -4515.51042 | 4.71 | 454.1 | 37959 |
|    |   |   | 21011 | 21.5 |             |      |       |       |
|    |   |   | 10211 | 10.6 |             |      |       |       |
|    |   |   | 01211 | 4.9  |             |      |       |       |
|    |   |   | 21101 | 3.1  |             |      |       |       |
| 24 | 8 | 2 | 12101 | 36.4 | -4515.50890 | 4.75 | 458.1 | 38294 |
|    |   |   | 11210 | 13.6 |             |      |       |       |
|    |   |   | 11012 | 11.3 |             |      |       |       |
|    |   |   | 10121 | 9.4  |             |      |       |       |
|    |   |   | 21101 | 8.1  |             |      |       |       |
| 25 | 9 | 2 | 12011 | 36.5 | -4515.50885 | 4.75 | 458.2 | 38305 |
|    |   |   | 11120 | 13.7 |             |      |       |       |
|    |   |   | 11102 | 11.5 |             |      |       |       |
|    |   |   | 10211 | 9.5  |             |      |       |       |
|    |   |   | 21011 | 7.6  |             |      |       |       |

<sup>[a]</sup> In all the configurations shown, the bonding Mn–O orbitals (MOs 1t<sub>2</sub>–3t<sub>2</sub> in Figure S8) were fully occupied, and the 4d orbitals (MOs 3e, 4e and 7t<sub>2</sub>–9 t<sub>2</sub> in Figure S8) were empty. This way, they have been omitted for clarity. The order of the orbital occupancies is the same as in Figure S8.

**Table S7.** SA-CASSCF(12,14)/NEVPT2 states, weights for the most relevant configurations (up to five), and energy difference for the various electronic states computed for  $[\text{Mn}(\text{OTeF}_5)_5]^{2-}$ .

| State | Root | Mult. | CI vector <sup>[a]</sup> |       |            | $E_{\text{NEVPT2}}$<br>(au) | $\Delta E_{\text{NEVPT2}}$ |                      |                  |
|-------|------|-------|--------------------------|-------|------------|-----------------------------|----------------------------|----------------------|------------------|
|       |      |       | Mn-O                     | 3d    | Weight (%) |                             | eV                         | $\text{kJ mol}^{-1}$ | $\text{cm}^{-1}$ |
| 0     | 0    | 5     | 2222                     | 11110 | 96.7       | -5356.94199                 | 0.00                       | 0.0                  | 0                |
|       |      |       | 2221                     | 11111 | 1.0        |                             |                            |                      |                  |
|       |      |       | 2220                     | 11112 | 0.4        |                             |                            |                      |                  |
| 1     | 1    | 5     | 2222                     | 11101 | 98.2       | -5356.8644                  | 2.11                       | 203.7                | 17025            |
|       |      |       | 2221                     | 11102 | 0.3        |                             |                            |                      |                  |
| 2     | 0    | 3     | 2222                     | 12100 | 62.7       | -5356.85904                 | 2.26                       | 217.8                | 18203            |
|       |      |       | 2222                     | 11200 | 14.9       |                             |                            |                      |                  |
|       |      |       | 2222                     | 21100 | 7.1        |                             |                            |                      |                  |
|       |      |       | 2222                     | 10120 | 5.0        |                             |                            |                      |                  |
|       |      |       | 2222                     | 02110 | 2.5        |                             |                            |                      |                  |
| 3     | 1    | 3     | 2222                     | 11200 | 39.3       | -5356.85823                 | 2.28                       | 219.9                | 18380            |
|       |      |       | 2222                     | 12100 | 21.4       |                             |                            |                      |                  |
|       |      |       | 2222                     | 21100 | 20.2       |                             |                            |                      |                  |
|       |      |       | 2222                     | 11110 | 3.5        |                             |                            |                      |                  |
|       |      |       | 2222                     | 11020 | 3.3        |                             |                            |                      |                  |
| 4     | 2    | 3     | 2222                     | 21100 | 42.3       | -5356.85603                 | 2.34                       | 225.6                | 18863            |
|       |      |       | 2222                     | 11200 | 28.8       |                             |                            |                      |                  |
|       |      |       | 2222                     | 11110 | 6.6        |                             |                            |                      |                  |
|       |      |       | 2222                     | 10210 | 4.8        |                             |                            |                      |                  |
|       |      |       | 2222                     | 01120 | 4.6        |                             |                            |                      |                  |
| 5     | 2    | 5     | 2222                     | 01111 | 76.6       | -5356.85498                 | 2.37                       | 228.4                | 19093            |
|       |      |       | 2222                     | 11011 | 20.3       |                             |                            |                      |                  |
|       |      |       | 1222                     | 11111 | 0.6        |                             |                            |                      |                  |
|       |      |       | 2212                     | 11111 | 0.3        |                             |                            |                      |                  |
| 6     | 3    | 5     | 2222                     | 11011 | 65.2       | -5356.85305                 | 2.42                       | 233.5                | 19518            |
|       |      |       | 2222                     | 01111 | 18.5       |                             |                            |                      |                  |
|       |      |       | 2222                     | 10111 | 12.9       |                             |                            |                      |                  |
|       |      |       | 2212                     | 11111 | 0.9        |                             |                            |                      |                  |
| 7     | 4    | 5     | 2222                     | 10111 | 83.5       | -5356.85295                 | 2.42                       | 233.7                | 19539            |
|       |      |       | 2222                     | 11011 | 10.9       |                             |                            |                      |                  |
|       |      |       | 2222                     | 01111 | 2.0        |                             |                            |                      |                  |
|       |      |       | 2122                     | 11111 | 1.2        |                             |                            |                      |                  |
| 8     | 3    | 3     | 2222                     | 11110 | 91.8       | -5356.84787                 | 2.56                       | 247.1                | 20655            |
|       |      |       | 2222                     | 21010 | 1.6        |                             |                            |                      |                  |
|       |      |       | 2222                     | 20011 | 1.1        |                             |                            |                      |                  |
|       |      |       | 2222                     | 01210 | 0.7        |                             |                            |                      |                  |
|       |      |       | 2222                     | 11101 | 0.6        |                             |                            |                      |                  |
| 9     | 4    | 3     | 2222                     | 21010 | 75.5       | -5356.84206                 | 2.72                       | 262.3                | 21928            |
|       |      |       | 2222                     | 01210 | 6.0        |                             |                            |                      |                  |

|    |   |   |      |       |      |             |      |       |       |
|----|---|---|------|-------|------|-------------|------|-------|-------|
|    |   |   | 2222 | 11110 | 3.4  |             |      |       |       |
|    |   |   | 2222 | 11200 | 2.9  |             |      |       |       |
|    |   |   | 2222 | 12100 | 2.9  |             |      |       |       |
| 10 | 5 | 3 | 2222 | 20110 | 75.1 | -5356.84064 | 2.76 | 266.0 | 22240 |
|    |   |   | 2222 | 02110 | 7.7  |             |      |       |       |
|    |   |   | 2222 | 11110 | 2.9  |             |      |       |       |
|    |   |   | 2222 | 11020 | 2.5  |             |      |       |       |
|    |   |   | 2222 | 11200 | 2.2  |             |      |       |       |
| 11 | 6 | 3 | 2222 | 11110 | 32.1 | -5356.83798 | 2.83 | 273.0 | 22824 |
|    |   |   | 2222 | 12010 | 21.1 |             |      |       |       |
|    |   |   | 2222 | 21100 | 19.3 |             |      |       |       |
|    |   |   | 2222 | 10210 | 15.0 |             |      |       |       |
|    |   |   | 2222 | 12001 | 3.9  |             |      |       |       |
| 12 | 7 | 3 | 2222 | 11110 | 47.2 | -5356.83672 | 2.86 | 276.3 | 23100 |
|    |   |   | 2222 | 12010 | 22.3 |             |      |       |       |
|    |   |   | 2222 | 10210 | 20.1 |             |      |       |       |
|    |   |   | 2222 | 11101 | 3.6  |             |      |       |       |
|    |   |   | 2222 | 01111 | 1.0  |             |      |       |       |
| 13 | 8 | 3 | 2222 | 11110 | 88.0 | -5356.82831 | 3.09 | 298.4 | 24946 |
|    |   |   | 2222 | 20011 | 3.7  |             |      |       |       |
|    |   |   | 2222 | 21010 | 1.0  |             |      |       |       |
|    |   |   | 2222 | 11101 | 0.8  |             |      |       |       |
|    |   |   | 2222 | 01210 | 0.7  |             |      |       |       |
| 14 | 0 | 1 | 2222 | 12100 | 25.6 | -5356.8149  | 3.46 | 333.6 | 27888 |
|    |   |   | 2222 | 11200 | 25.0 |             |      |       |       |
|    |   |   | 2222 | 02110 | 10.2 |             |      |       |       |
|    |   |   | 2222 | 22000 | 9.7  |             |      |       |       |
|    |   |   | 2222 | 20110 | 7.7  |             |      |       |       |
| 15 | 1 | 1 | 2222 | 11110 | 18.5 | -5356.81381 | 3.49 | 336.5 | 28128 |
|    |   |   | 2222 | 12100 | 16.3 |             |      |       |       |
|    |   |   | 2222 | 02200 | 11.7 |             |      |       |       |
|    |   |   | 2222 | 20200 | 10.7 |             |      |       |       |
|    |   |   | 2222 | 21100 | 10.3 |             |      |       |       |
| 16 | 9 | 3 | 2222 | 11020 | 54.3 | -5356.81389 | 3.49 | 336.3 | 28110 |
|    |   |   | 2222 | 02110 | 12.7 |             |      |       |       |
|    |   |   | 2222 | 11011 | 8.3  |             |      |       |       |
|    |   |   | 2222 | 10120 | 6.8  |             |      |       |       |
|    |   |   | 2222 | 01210 | 2.6  |             |      |       |       |
| 17 | 2 | 1 | 2222 | 11200 | 19.7 | -5356.81337 | 3.50 | 337.7 | 28225 |
|    |   |   | 2222 | 11110 | 15.1 |             |      |       |       |
|    |   |   | 2222 | 22000 | 14.6 |             |      |       |       |
|    |   |   | 2222 | 02200 | 10.5 |             |      |       |       |
|    |   |   | 2222 | 21100 | 5.6  |             |      |       |       |
| 18 | 3 | 1 | 2222 | 21100 | 35.4 | -5356.81298 | 3.51 | 338.7 | 28309 |

|    |    |   |      |       |      |             |      |       |       |
|----|----|---|------|-------|------|-------------|------|-------|-------|
|    |    |   | 2222 | 20200 | 19.2 |             |      |       |       |
|    |    |   | 2222 | 10210 | 13.1 |             |      |       |       |
|    |    |   | 2222 | 22000 | 10.7 |             |      |       |       |
|    |    |   | 2222 | 11200 | 7.3  |             |      |       |       |
| 19 | 4  | 1 | 2222 | 11110 | 28.9 | -5356.81158 | 3.55 | 342.3 | 28616 |
|    |    |   | 2222 | 12100 | 17.4 |             |      |       |       |
|    |    |   | 2222 | 21010 | 8.4  |             |      |       |       |
|    |    |   | 2222 | 01210 | 7.4  |             |      |       |       |
|    |    |   | 2222 | 22000 | 7.4  |             |      |       |       |
| 20 | 10 | 3 | 2222 | 10120 | 54.2 | -5356.81033 | 3.58 | 345.6 | 28893 |
|    |    |   | 2222 | 01210 | 10.6 |             |      |       |       |
|    |    |   | 2222 | 10111 | 9.0  |             |      |       |       |
|    |    |   | 2222 | 11020 | 5.3  |             |      |       |       |
|    |    |   | 2222 | 02110 | 3.1  |             |      |       |       |
| 21 | 11 | 3 | 2222 | 10210 | 32.1 | -5356.80851 | 3.63 | 350.4 | 29292 |
|    |    |   | 2222 | 12010 | 24.9 |             |      |       |       |
|    |    |   | 2222 | 11101 | 11.7 |             |      |       |       |
|    |    |   | 2222 | 10201 | 7.5  |             |      |       |       |
|    |    |   | 2222 | 12001 | 5.7  |             |      |       |       |

<sup>[a]</sup> Mn–O orbitals refer to bonding MOs 1b<sub>2</sub>, 1e, 2e and 1b<sub>1</sub>, and 3d refer to antibonding orbitals that mainly correspond to 3d orbitals of Mn: 2b<sub>2</sub>, 3e, 4e, 1a<sub>1</sub> and 2b<sub>1</sub>. The 4d orbitals (3b<sub>2</sub>, 5e, 6e, 2a<sub>1</sub> and 3b<sub>1</sub>) were empty in all the vectors shown and have been omitted. The order of the orbital occupancies is the same as in Figure S9.

#### 6.4. DFT-optimized structures

The coordinates of the DFT-optimized structures are provided below. Note that, for [Mn(OTeF<sub>5</sub>)<sub>4</sub>]<sup>2-</sup>, we only calculated the HS structure, while for [Mn(OTeF<sub>5</sub>)<sub>5</sub>]<sup>2-</sup> we considered HS, IS and LS possibilities.

As introduced in the main text, initial geometries of the square pyramid (*SPY-5*) and trigonal bipyramid (*TBPY-5*) geometries converged to slightly different square pyramid structures, which are referred to as *SPY-5* and *SPY-5'*. In this regard, we note that, in the case of TPSSh, the *SPY-5'* geometry is closer to a trigonal bipyramid, but we have kept the nomenclature for simplicity. The structure and energy of both structures are very similar (see Table S9). In order to obtain the *TBPY-5* geometry, we performed a constrained geometry optimization, in which we fixed the angle of O–Mn–O bonds in the equatorial positions at 120° and imposed the Mn and the three O atoms in the equatorial positions to be on the same plane (dihedral angle of 0°). When the electronic

energy is considered (Tables S8 and S9), the square pyramid structure is the most stable for all functionals. Nonetheless, the energy difference is very small, being 8.9 kJ mol<sup>-1</sup> at the maximum (for M06-L, Table S9). When we compare Gibbs energies (Tables S10 and S11), the square pyramid structure is the most favorable geometry for B3LYP, M06-L and TPSSh functionals, the trigonal bipyramid being 2.7 kJ mol<sup>-1</sup> higher in energy for M06. In this respect, we note that the energy differences between both are still very small and that small imaginary frequencies (of the order of 20i cm<sup>-1</sup>) appear when B3LYP and TPSSh functionals are considered (due to the optimization under geometry constraints). This way, we consider the electronic energy to be more reliable to compare the relative stability of both geometries.

Given that IS and LS structures are significantly above in energy, we only provide the most stable structure. We note that there are significant variations depending on the functional. However, as LS and IS structures are very high in energy in all cases when compared to the HS analogues, such differences are not further analyzed. For the sake of completeness, we provide the energy (electronic and Gibbs energy) data of the various considered structures with each functional in Tables S8-S11.

**Table S8.** Electronic energies (in au) for the various structures considered for [Mn(OTeF<sub>5</sub>)<sub>5</sub>]<sup>2-</sup> as a function of the DFT functional.

|       | HS           |               |               | IS          | LS          |
|-------|--------------|---------------|---------------|-------------|-------------|
|       | <i>SPY-5</i> | <i>SPY-5'</i> | <i>TBPY-5</i> |             |             |
| B3LYP | -5365.63405  | -5365.63392   | -5365.63161   | -5365.59108 | -5365.57871 |
| M06-L | -5365.58030  | -5365.57868   | -5365.57692   | -5365.52846 | -5365.50181 |
| M06   | -5364.48206  | -5364.48130   | -5364.48052   | -5364.41027 | -5364.39374 |
| TPSSh | -5364.62045  | -5364.61977   | -5364.61874   | -5364.58440 | -5364.57803 |

**Table S9.** Electronic energy difference (in kJ mol<sup>-1</sup>) for the various structures considered for [Mn(OTeF<sub>5</sub>)<sub>5</sub>]<sup>2-</sup> as a function of the DFT functional.

|       | HS           |               |               | IS    | LS    |
|-------|--------------|---------------|---------------|-------|-------|
|       | <i>SPY-5</i> | <i>SPY-5'</i> | <i>TBPY-5</i> |       |       |
| B3LYP | 0.0          | 0.4           | 6.4           | 112.8 | 145.3 |
| M06-L | 0.0          | 4.2           | 8.9           | 136.1 | 206.1 |
| M06   | 0.0          | 2.0           | 4.0           | 188.5 | 231.9 |
| TPSSh | 0.0          | 1.8           | 4.5           | 94.7  | 111.4 |

**Table S10.** Gibbs energies (in au) for the various structures considered for  $[\text{Mn}(\text{OTeF}_5)_5]^{2-}$  as a function of the DFT functional.

|       | HS           |               |               | IS          | LS          |
|-------|--------------|---------------|---------------|-------------|-------------|
|       | <i>SPY-5</i> | <i>SPY-5'</i> | <i>TBPY-5</i> |             |             |
| B3LYP | -5365.64731  | -5365.64733   | -5365.64304   | -5365.59907 | -5365.58881 |
| M06-L | -5365.58874  | -5365.58547   | -5365.58667   | -5365.53612 | -5365.50936 |
| M06   | -5364.47815  | -5364.47802   | -5364.47919   | -5364.40707 | -5364.39170 |
| TPSSh | -5364.63557  | -5364.63468   | -5364.63131   | -5364.59737 | -5364.59062 |

**Table S11.** Gibbs energy difference (in  $\text{kJ mol}^{-1}$ ) for the various structures considered for  $[\text{Mn}(\text{OTeF}_5)_5]^{2-}$  as a function of the DFT functional.

|       | HS           |               |               | IS    | LS    |
|-------|--------------|---------------|---------------|-------|-------|
|       | <i>SPY-5</i> | <i>SPY-5'</i> | <i>TBPY-5</i> |       |       |
| B3LYP | 0.0          | 0.0           | 11.3          | 126.7 | 153.6 |
| M06-L | 0.0          | 8.6           | 5.4           | 138.1 | 208.4 |
| M06   | 2.7          | 3.1           | 0.0           | 189.3 | 229.7 |
| TPSSh | 0.0          | 2.3           | 11.2          | 100.3 | 118.0 |

With respect to fluoride-based structures ( $[\text{MnF}_n]^{2-}$  ( $n = 4, 5$ )), we only considered the HS analogues (the structures are provided below). For  $[\text{MnF}_4]^{2-}$ , we found a tetrahedral geometry, while for  $[\text{MnF}_5]^{2-}$  we considered both *SPY-5* and *TBPY-5* alternatives (see Tables S12 and S13 for absolute and relative electronic and Gibbs energies). The *TBPY-5* structures do not show any imaginary frequency for any functional, while the *SPY-5* ones show a single imaginary frequency for B3LYP ( $9i \text{ cm}^{-1}$ ) and M06 ( $32i \text{ cm}^{-1}$ ), which corresponds to the interconversion to the *TBPY-5* geometry. With respect to relative electronic energies, the *TBPY-5* is the global minimum for B3LYP, M06 and M06-L, while it is  $0.4 \text{ kJ mol}^{-1}$  higher than the *SPY-5* for TPSSh. When Gibbs energies are considered, the *TBPY-5* structure is the global minimum in all the cases. However, the energy differences are always very small (being lower than the DFT accuracy) and, as a result, we cannot make a definitive comparison.

**Table S12.** Electronic ( $E$ ) and Gibbs ( $G$ ) energies (in au) for the various structures considered for  $[\text{MnF}_5]^{2-}$  as a function of the DFT functional.

|       | <i>SPY-5</i> |             | <i>TBPY-5</i> |             |
|-------|--------------|-------------|---------------|-------------|
|       | $E$          | $G$         | $E$           | $G$         |
| B3LYP | -1650.67392  | -1650.69877 | -1650.67444   | -1650.70131 |
| M06-L | -1650.51730  | -1650.54451 | -1650.51777   | -1650.54478 |
| M06   | -1650.41444  | -1650.43889 | -1650.41530   | -1650.44168 |
| TPSSh | -1650.62257  | -1650.64922 | -1650.62242   | -1650.64974 |

**Table S13.** Electronic ( $E$ ) and Gibbs ( $G$ ) energy difference (in  $\text{kJ mol}^{-1}$ ) with respect to the global minimum (which takes the value of  $0.0 \text{ kJ mol}^{-1}$ ) for the various structures considered for  $[\text{MnF}_5]^{2-}$  as a function of the DFT functional.

|       | $\Delta E$   |               | $\Delta G$   |               |
|-------|--------------|---------------|--------------|---------------|
|       | <i>SPY-5</i> | <i>TBPY-5</i> | <i>SPY-5</i> | <i>TBPY-5</i> |
| B3LYP | 1.4          | 0.0           | 6.7          | 0.0           |
| M06-L | 1.2          | 0.0           | 0.7          | 0.0           |
| M06   | 2.3          | 0.0           | 7.3          | 0.0           |
| TPSSh | 0.0          | 0.4           | 1.3          | 0.0           |

**$[\text{Mn}(\text{OTeF}_5)_4]^{2-}$**

|              |             |             |             |            |             |             |             |
|--------------|-------------|-------------|-------------|------------|-------------|-------------|-------------|
| <b>B3LYP</b> |             |             |             | F          | 1.29931300  | -4.12138500 | 1.65481300  |
| Te           | -2.47316800 | -2.13239800 | -1.53489900 | F          | -1.27167500 | 4.12212000  | 1.65604100  |
| Te           | 2.44611900  | 2.13308000  | -1.55376000 | F          | -3.68690200 | 3.42348100  | 1.98512800  |
| Mn           | 0.00042200  | -0.00450800 | 0.00180100  | F          | -2.60347600 | 2.81448600  | -0.22872900 |
| F            | 1.98595900  | -2.27426200 | 3.40547800  |            |             |             |             |
| F            | -1.93609000 | 2.28018400  | 3.42080800  | <b>M06</b> |             |             |             |
| F            | -2.83276100 | -2.60946800 | 0.24750500  | Te         | 2.28005100  | 2.31375200  | 1.43096800  |
| F            | -0.98856600 | -3.28721100 | -1.54744400 | Te         | -2.28087800 | -2.31388000 | 1.43035700  |
| F            | 3.29821400  | -0.95611900 | 1.51963900  | Mn         | -0.00000900 | -0.00016900 | 0.00023700  |
| F            | 0.95372300  | 3.27753900  | -1.54339100 | F          | 2.28534100  | -2.14249100 | -3.29322500 |
| F            | -3.27012700 | 0.95522800  | 1.55504400  | F          | -2.28238300 | 2.14415000  | -3.29374800 |
| F            | -4.13870200 | -1.26144800 | -1.62722600 | F          | 2.71131100  | 2.52351400  | -0.36852300 |
| O            | -1.53957100 | -0.63328600 | -1.14971700 | F          | 3.30423200  | 0.75767200  | 1.49840400  |
| O            | 0.64211200  | -1.53192600 | 1.16567000  | F          | 0.75837000  | -3.30395500 | -1.50123300 |
| O            | 1.52765000  | 0.62407600  | -1.16927700 | F          | -3.30443700 | -0.75745600 | 1.49936500  |
| O            | -0.61904200 | 1.53106500  | 1.16735300  | F          | -0.75758800 | 3.30433900  | -1.49907000 |
| F            | -3.46244700 | -3.68192500 | -1.96624500 | F          | 1.55674700  | 4.03224800  | 1.44964500  |
| F            | -2.31120000 | -1.93678700 | -3.40298900 | O          | 0.71146300  | 1.48999400  | 1.15704100  |
| F            | 4.11687300  | 1.27475400  | -1.66969300 | O          | 1.49078900  | -0.71158500 | -1.15586600 |
| F            | 2.82178900  | 2.60103200  | 0.22759500  | O          | -0.71205000 | -1.49056500 | 1.15643000  |
| F            | 3.42009500  | 3.69222600  | -1.98546400 | O          | -1.49003400 | 0.71163600  | -1.15663500 |
| F            | 2.26626300  | 1.94874900  | -3.42146400 | F          | 3.90411500  | 3.18883800  | 1.74614700  |
| Te           | 2.15523100  | -2.44943000 | 1.53596500  | F          | 2.14466200  | 2.28205700  | 3.29388400  |
| Te           | -2.12794500 | 2.44947100  | 1.55285100  | F          | -1.55826500 | -4.03268000 | 1.44753600  |
| F            | 3.71864300  | -3.42313200 | 1.95239400  | F          | -2.71297200 | -2.52216200 | -0.36910200 |
| F            | 2.60862500  | -2.82077200 | -0.25017700 | F          | -3.90515400 | -3.18854500 | 1.74562500  |

|              |             |             |             |              |             |             |             |
|--------------|-------------|-------------|-------------|--------------|-------------|-------------|-------------|
| F            | -2.14471300 | -2.28354700 | 3.29323600  | F            | 3.93538700  | -1.85448300 | -1.41931400 |
| Te           | 2.31451300  | -2.28010000 | -1.43043400 | F            | -3.93542000 | 1.85410600  | -1.41956800 |
| Te           | -2.31368600 | 2.28024600  | -1.43087900 | F            | -2.95335400 | 4.17196300  | -1.65276100 |
| F            | 3.18970900  | -3.90394700 | -1.74643900 | F            | -2.35238000 | 2.88161700  | 0.44514400  |
| F            | 2.52174000  | -2.71359200 | 0.36880800  |              |             |             |             |
| F            | 4.03318800  | -1.55714700 | -1.44591500 | <b>TPSSh</b> |             |             |             |
| F            | -4.03226100 | 1.55711900  | -1.44895500 | Te           | -1.50350800 | -2.67260800 | 2.04344100  |
| F            | -3.18872400 | 3.90424700  | -1.74652600 | Te           | 1.50348200  | 2.66959300  | 2.04698000  |
| F            | -2.52304900 | 2.71216400  | 0.36849800  | Mn           | -0.00015000 | -0.00005100 | -0.00005200 |
|              |             |             |             | F            | -2.41176200 | 0.69307000  | -3.72020600 |
| <b>M06-L</b> |             |             |             | F            | 2.41133900  | -0.68817700 | -3.72116900 |
| Te           | 2.48117700  | 2.16388100  | 1.37931700  | F            | -2.53411000 | -3.15642600 | 0.54962100  |
| Te           | -2.48111400 | -2.16361400 | 1.37965400  | F            | -2.74290300 | -1.32105800 | 2.45296800  |
| Mn           | 0.00004600  | 0.00002000  | 0.00004000  | F            | -1.31901300 | 2.74401100  | -2.45269400 |
| F            | 2.13831200  | -2.39486200 | -3.26072900 | F            | 2.74269700  | 1.31729200  | 2.45456400  |
| F            | -2.13840800 | 2.39422800  | -3.26111600 | F            | 1.31946300  | -2.74099400 | -2.45596300 |
| F            | 2.88145100  | 2.35242000  | -0.44561400 | F            | -0.48054400 | -4.23305000 | 1.81923100  |
| F            | 3.42882800  | 0.54154600  | 1.42301200  | O            | -0.34795900 | -1.61168900 | 1.14581700  |
| F            | 0.54142300  | -3.42881200 | -1.42292100 | O            | -1.61105700 | 0.34864700  | -1.14666100 |
| F            | -3.42873200 | -0.54126700 | 1.42338600  | O            | 0.34776600  | 1.61003400  | 1.14796100  |
| F            | -0.54155800 | 3.42864400  | -1.42356100 | O            | 1.61079300  | -0.34704000 | -1.14712800 |
| F            | 1.85436800  | 3.93545600  | 1.41949200  | F            | -2.68136800 | -3.79720300 | 2.99502000  |
| O            | 0.85056000  | 1.42526000  | 1.14405200  | F            | -0.69079500 | -2.41360800 | 3.71906400  |
| O            | 1.42523300  | -0.85055700 | -1.14401300 | F            | 0.48066900  | 4.23046300  | 1.82506100  |
| O            | -0.85047300 | -1.42508300 | 1.14423900  | F            | 2.53395100  | 3.15534800  | 0.55370500  |
| O            | -1.42520000 | 0.85037600  | -1.14411700 | F            | 2.68163600  | 3.79271500  | 2.99993400  |
| F            | 4.17228700  | 2.95335200  | 1.65194900  | F            | 0.69089200  | 2.40841100  | 3.72233000  |
| F            | 2.39494300  | 2.13837600  | 3.26075500  | Te           | -2.67119400 | 1.50495000  | -2.04424100 |
| F            | -1.85435600 | -3.93521200 | 1.41976400  | Te           | 2.67123200  | -1.50192100 | -2.04617900 |
| F            | -2.88157800 | -2.35218200 | -0.44522800 | F            | -3.79504900 | 2.68375900  | -2.99552200 |
| F            | -4.17221000 | -2.95305000 | 1.65247900  | F            | -3.15523400 | 2.53489900  | -0.55005000 |
| F            | -2.39468500 | -2.13806800 | 3.26108400  | F            | -4.23202400 | 0.48229200  | -1.82133500 |
| Te           | 2.16377400  | -2.48120200 | -1.37929400 | F            | 4.23171600  | -0.47897000 | -1.82222400 |
| Te           | -2.16384500 | 2.48093700  | -1.37969800 | F            | 3.79542500  | -2.67920400 | -2.99894600 |
| F            | 2.95317700  | -4.17233000 | -1.65202400 | F            | 3.15576800  | -2.53346100 | -0.55324600 |
| F            | 2.35231800  | -2.88150600 | 0.44563200  |              |             |             |             |



**[MnF<sub>4</sub>]<sup>2-</sup>**

|              |            |             |            |   |             |             |             |
|--------------|------------|-------------|------------|---|-------------|-------------|-------------|
| <b>B3LYP</b> |            |             |            | F | -0.92249400 | -1.37770700 | -1.18275600 |
| Mn           | 0.00044600 | -0.00032400 | 0.00020300 | F | -1.30362600 | 0.64690300  | 1.42465700  |
| F            | 1.62346900 | -0.84893600 | 0.89227700 | F | 0.60141300  | 1.58063900  | -1.13474400 |

**[Mn(OTeF<sub>5</sub>)<sub>5</sub>]<sup>2-</sup>**

|                   |             |             |             |                    |             |             |             |
|-------------------|-------------|-------------|-------------|--------------------|-------------|-------------|-------------|
| <b>B3LYP</b>      |             |             |             | F                  | 3.50139900  | -0.42469800 | 0.12145200  |
| <b>HS – SPY-5</b> |             |             |             | F                  | 5.06884800  | 0.74571400  | -1.50231700 |
| Te                | -1.07295700 | 3.30951500  | -0.57826300 | F                  | 2.02220800  | 1.10212000  | 2.36037500  |
| Te                | 0.79925900  | -3.36085000 | -0.54307800 | F                  | -0.27315400 | 1.80060900  | 3.49500300  |
| Mn                | -0.12826500 | -0.00986200 | -0.59297000 | F                  | 1.37827900  | 0.28330800  | 4.67784200  |
| F                 | 3.08051400  | -0.47100900 | -2.51395000 | F                  | 1.45538900  | -1.44653500 | 2.82089700  |
| F                 | -3.39152800 | 0.34695800  | 0.70904300  | F                  | -0.82847500 | -0.73317600 | 3.94274600  |
| F                 | -3.82433300 | 0.30541400  | -1.91477000 |                    |             |             |             |
| F                 | -0.45447000 | -3.27481000 | 0.83392900  | <b>HS – SPY-5'</b> |             |             |             |
| F                 | 0.26082300  | 3.19165600  | 0.71766400  | Te                 | -3.36695700 | -0.66054700 | -0.29818600 |
| F                 | -0.55600300 | -3.63838600 | -1.80451500 | Te                 | 3.52030900  | 0.41627200  | -0.52559400 |
| F                 | 0.20231700  | 3.70029500  | -1.89339800 | Mn                 | 0.06340100  | 0.04478900  | -0.39656700 |
| F                 | -2.41600100 | 3.71649000  | -1.82375800 | F                  | -0.00139800 | 2.19020900  | -2.79727500 |
| F                 | -2.38067700 | 3.23548600  | 0.75380300  | F                  | -0.90414100 | -3.24238900 | 0.35917700  |
| F                 | 2.18992900  | -3.41196000 | 0.69978100  | F                  | -0.81745500 | -3.30884200 | -2.30335500 |
| O                 | -1.66991400 | -1.08115800 | -0.95470600 | F                  | 3.30576700  | -1.05635300 | 0.59856600  |
| O                 | 1.41539600  | 1.05838100  | -0.94874000 | F                  | -3.44298500 | 1.08826800  | 0.34635700  |
| O                 | -1.18677900 | 1.52838200  | -0.98475000 | F                  | 3.52974900  | -0.69425700 | -2.03379600 |
| O                 | 0.94900800  | -1.55881000 | -0.81795000 | F                  | -4.05963500 | -0.07615100 | -1.93966800 |
| F                 | 2.05241100  | -3.72716700 | -1.88880300 | F                  | -3.60637500 | -2.42322200 | -0.88005400 |
| F                 | -1.04963400 | 5.16080900  | -0.23673900 | F                  | -2.95577800 | -1.27846000 | 1.41213800  |
| F                 | 0.72960700  | -5.22755700 | -0.30464900 | F                  | 3.83158000  | 1.50133500  | 0.96522200  |
| O                 | -0.33229900 | 0.06063000  | 1.40950500  | O                  | 0.85263800  | -1.57978400 | -1.01385700 |
| Te                | -3.46015400 | -0.97813200 | -0.59914600 | O                  | -0.64988700 | 1.80976900  | -0.16862600 |
| Te                | 3.21281300  | 0.85864400  | -1.19990700 | O                  | -1.64903400 | -0.61014400 | -0.92276400 |
| Te                | 0.52253200  | 0.17260300  | 2.99804700  | O                  | 1.75969700  | 0.88674000  | -0.64585100 |
| F                 | -5.32080200 | -0.96976700 | -0.30607000 | F                  | 4.03090100  | 1.84634100  | -1.62663000 |
| F                 | -3.83004100 | -2.31443100 | -1.86312600 | F                  | -5.16737900 | -0.77333700 | 0.24361800  |
| F                 | -3.41256900 | -2.29380200 | 0.72785000  | F                  | 5.36275100  | 0.03500700  | -0.43667400 |
| F                 | 3.22916000  | 2.13707200  | -2.57351700 | O                  | 0.09828900  | -0.42559900 | 1.56435900  |
| F                 | 3.64744300  | 2.21787600  | 0.00517000  | Te                 | 0.44631200  | -3.35911300 | -0.92210800 |

|    |             |             |             |    |             |             |             |
|----|-------------|-------------|-------------|----|-------------|-------------|-------------|
| Te | -0.70348000 | 3.18711900  | -1.36541600 | Te | -2.85237700 | 1.85717800  | -0.30857800 |
| Te | 0.09656000  | 0.40581700  | 3.17325400  | Te | 0.03683300  | 0.08058100  | 3.28877200  |
| F  | 0.11124200  | -5.21173100 | -0.89994000 | F  | 4.17222400  | -3.24602600 | 0.12584600  |
| F  | 1.76064500  | -3.77224700 | -2.19381800 | F  | 4.27143100  | -1.12714400 | -1.28000600 |
| F  | 1.68712600  | -3.72268800 | 0.42781600  | F  | 3.48361400  | -1.05880800 | 1.22677600  |
| F  | -2.42920200 | 2.78976900  | -1.97541100 | F  | -4.13829600 | 0.52079500  | -0.54197000 |
| F  | -1.43999200 | 4.37170400  | -0.11979300 | F  | -3.55647900 | 2.17546400  | 1.39399300  |
| F  | 0.99518400  | 3.85676100  | -0.96691700 | F  | -1.81491300 | 3.39944000  | -0.13490900 |
| F  | -0.79140200 | 4.61863900  | -2.58433800 | F  | -4.18971100 | 3.02567500  | -0.93310200 |
| F  | 0.92861200  | 1.98502500  | 2.59412200  | F  | -0.36823900 | 1.85655900  | 2.84872100  |
| F  | -1.58490200 | 1.21503000  | 2.97612000  | F  | -1.76957300 | -0.39418100 | 3.17022700  |
| F  | 0.09975100  | 1.22803900  | 4.87343700  | F  | -0.38608500 | 0.58703600  | 5.05514500  |
| F  | 1.77364300  | -0.26822800 | 3.69157600  | F  | 1.77935400  | 0.61509200  | 3.73619900  |
| F  | -0.71645300 | -1.03422900 | 4.06803800  | F  | 0.40339700  | -1.60410100 | 4.03218200  |

HS – *TBPY-5*

|    |             |             |             |
|----|-------------|-------------|-------------|
| Te | -2.02705100 | -2.73180900 | -1.27385400 |
| Te | 1.94698200  | 2.73353200  | -1.37551600 |
| Mn | 0.03347800  | -0.00771000 | -0.25510900 |
| F  | -2.35721800 | 1.68593100  | -2.10423600 |
| F  | 1.70354800  | -2.95908800 | 0.69926200  |
| F  | 2.53015000  | -3.01040500 | -1.80115200 |
| F  | 3.07375200  | 1.93289200  | -0.11293900 |
| F  | -2.77101300 | -2.25762500 | 0.37643100  |
| F  | 2.58692700  | 1.59233400  | -2.71726700 |
| F  | -3.40230700 | -1.83621600 | -2.17877400 |
| F  | -1.47320900 | -3.44907500 | -2.91888600 |
| F  | -0.84713400 | -3.89409700 | -0.39932000 |
| F  | 1.55003700  | 4.08133400  | -0.13460700 |
| O  | 1.70801800  | -0.64220100 | -0.83249100 |
| O  | -1.60703900 | 0.69257100  | 0.35758100  |
| O  | -0.85977900 | -1.34500100 | -1.38210800 |
| O  | 0.46060300  | 1.76067600  | -0.98440300 |
| F  | 1.05835200  | 3.73271900  | -2.69343300 |
| F  | -3.22974100 | -4.18228800 | -1.23085400 |
| F  | 3.43995200  | 3.80013000  | -1.80508200 |
| O  | 0.50112300  | -0.44441200 | 1.61193300  |
| Te | 2.89177200  | -1.93674100 | -0.30949000 |

IS

|    |             |             |             |
|----|-------------|-------------|-------------|
| Te | 3.07959500  | 1.58317000  | -0.54246700 |
| Te | -3.18620400 | -1.41877200 | -0.61167700 |
| Mn | -0.00328800 | -0.05479000 | -0.44793000 |
| F  | 0.73413900  | -2.29571400 | -2.52221200 |
| F  | 0.06873300  | 3.41992700  | 0.12979400  |
| F  | -0.83192500 | 3.66417300  | -2.35362200 |
| F  | -3.48584100 | 0.10907400  | 0.41696300  |
| F  | 3.73113200  | 0.01053400  | 0.22009400  |
| F  | -3.44642700 | -0.45450900 | -2.19586700 |
| F  | 3.90037600  | 1.12219300  | -2.16480400 |
| F  | 2.73716000  | 3.27942800  | -1.25598900 |
| F  | 2.51112200  | 2.15444000  | 1.13999100  |
| F  | -3.23146000 | -2.45768500 | 0.94458700  |
| O  | -1.18830100 | 1.28329100  | -1.15090400 |
| O  | 1.18543700  | -1.49316200 | 0.05633300  |
| O  | 1.46253500  | 0.93197900  | -1.10088700 |
| O  | -1.35555800 | -1.34203500 | -0.64074000 |
| F  | -3.17932800 | -2.99702400 | -1.62400600 |
| F  | 4.75315000  | 2.31182600  | -0.07537700 |
| F  | -5.05938700 | -1.61396100 | -0.61018100 |
| O  | -0.19360200 | 0.54966900  | 1.28369300  |
| Te | -1.54624400 | 3.02953700  | -0.73287300 |

|    |             |             |             |
|----|-------------|-------------|-------------|
| Te | 1.59822900  | -2.94489200 | -0.97410900 |
| Te | 0.05777300  | -0.25150500 | 2.93218500  |
| F  | -1.97166500 | 4.84099400  | -0.42132400 |
| F  | -3.23266200 | 2.95087500  | -1.55803600 |
| F  | -2.35748100 | 2.72545500  | 0.92729600  |
| F  | 3.21045500  | -2.23218400 | -1.62077100 |
| F  | 2.55632200  | -3.78515400 | 0.40046300  |
| F  | 0.09567500  | -3.96660300 | -0.51746100 |
| F  | 2.05695700  | -4.43833500 | -2.02800700 |
| F  | -0.35390900 | -2.00878400 | 2.43997900  |
| F  | 1.89105600  | -0.57870900 | 2.75086900  |
| F  | 0.26278700  | -0.94220900 | 4.67273900  |
| F  | -1.73706200 | 0.00305800  | 3.40880000  |
| F  | 0.44857700  | 1.40776100  | 3.70977400  |

**LS**

|    |             |             |             |
|----|-------------|-------------|-------------|
| Te | -1.19430200 | -3.09471600 | -1.31177400 |
| Te | 1.29010000  | 3.03431100  | -1.37082600 |
| Mn | 0.14811300  | -0.03693400 | -0.21808500 |
| F  | -2.57037500 | 1.32043600  | -2.22538200 |
| F  | 2.32326700  | -2.37828000 | 0.97894200  |
| F  | 3.23267500  | -2.38580800 | -1.51145500 |
| F  | 2.56389100  | 2.67634900  | -0.05114800 |
| F  | -2.30763500 | -2.84468100 | 0.16575900  |
| F  | 2.24515100  | 2.04185100  | -2.63931800 |
| F  | -2.26895500 | -1.99643200 | -2.38084700 |
| F  | -0.25298200 | -3.60824500 | -2.85208800 |
| F  | -0.27171200 | -4.41909200 | -0.35978100 |
| F  | 0.49371100  | 4.27661500  | -0.21808300 |
| O  | 2.01658700  | -0.11390700 | -0.63211100 |
| O  | -1.74615900 | 0.03614800  | 0.07012300  |
| O  | 0.03544400  | -1.80128400 | -0.91575200 |
| O  | 0.10022800  | 1.71225600  | -0.92822800 |
| F  | 0.17738700  | 3.65325800  | -2.74733500 |
| F  | -2.38717500 | -4.47284100 | -1.78426300 |
| F  | 2.42333600  | 4.45523500  | -1.86568600 |
| O  | 0.56279600  | -0.01926500 | 1.63088700  |
| Te | 3.35884100  | -1.21118700 | -0.05315000 |

|    |             |             |             |
|----|-------------|-------------|-------------|
| Te | -3.13622300 | 1.10370900  | -0.45040500 |
| Te | -0.32842500 | 0.17086400  | 3.21861600  |
| F  | 4.81616900  | -2.28725600 | 0.46840500  |
| F  | 4.64042000  | -0.22714300 | -1.00748600 |
| F  | 3.76550700  | -0.20793600 | 1.47571700  |
| F  | -4.18658800 | -0.35591000 | -0.97478700 |
| F  | -3.96426200 | 1.01546100  | 1.22667100  |
| F  | -2.38843900 | 2.74943000  | 0.02745500  |
| F  | -4.62959000 | 2.13329600  | -0.96696100 |
| F  | -1.39219000 | 1.61500100  | 2.68883200  |
| F  | -1.70265500 | -1.04148700 | 2.85305800  |
| F  | -1.15506200 | 0.36852100  | 4.89869900  |
| F  | 0.93994300  | 1.38450900  | 3.87903100  |
| F  | 0.64132900  | -1.21409800 | 4.02925100  |

**M06-L**

**HS – SPY-5**

|    |             |             |             |
|----|-------------|-------------|-------------|
| Te | -3.40767400 | 0.00410700  | -0.82293500 |
| Te | 3.47869400  | 0.03231800  | -0.68145000 |
| Mn | 0.03769500  | 0.01806500  | -0.80570000 |
| F  | 1.49574300  | 3.48886000  | -1.78869100 |
| F  | -1.06157400 | -2.89171500 | 0.67247500  |
| F  | -1.40916800 | -3.40856500 | -1.91204200 |
| F  | 2.95052000  | -1.05889500 | 0.73234000  |
| F  | -2.93766600 | 1.02140500  | 0.66439700  |
| F  | 3.48203500  | -1.43476400 | -1.84434800 |
| F  | -3.34926300 | 1.52575200  | -1.91140900 |
| F  | -4.14112500 | -0.93607800 | -2.26969300 |
| F  | -3.79947400 | -1.45811100 | 0.26782100  |
| F  | 3.80529800  | 1.43732700  | 0.50293400  |
| O  | 0.66628200  | -1.75475200 | -1.17417900 |
| O  | -0.57855600 | 1.79915400  | -1.14880500 |
| O  | -1.72910200 | -0.59928900 | -1.22582800 |
| O  | 1.81946400  | 0.64531700  | -1.14470900 |
| F  | 4.27723000  | 1.04876100  | -2.03948300 |
| F  | -5.17493500 | 0.53448000  | -0.46839000 |
| F  | 5.23133400  | -0.50628800 | -0.26991600 |
| O  | 0.02192000  | 0.00569700  | 1.17591400  |

|    |             |             |             |    |             |             |             |
|----|-------------|-------------|-------------|----|-------------|-------------|-------------|
| Te | 0.04348200  | -3.41728300 | -0.73133900 | Te | 0.13996100  | -3.42706600 | -0.65815700 |
| Te | 0.01175200  | 3.45629300  | -0.64784500 | Te | -0.06877500 | 3.36916300  | -0.92852300 |
| Te | -0.12980600 | -0.07685300 | 2.96777800  | Te | -0.09952300 | 0.23812100  | 3.07548300  |
| F  | -0.50530100 | -5.17058100 | -0.33899100 | F  | -0.29725100 | -5.23465200 | -0.38916600 |
| F  | 1.07323900  | -4.20614100 | -2.08476800 | F  | 1.68557900  | -4.08653200 | -1.48073600 |
| F  | 1.43452600  | -3.75664100 | 0.46475800  | F  | 0.99273400  | -3.54295900 | 0.99496300  |
| F  | -0.99113500 | 4.26577800  | -2.00899000 | F  | -1.71931600 | 3.51877200  | -1.79955900 |
| F  | -1.41287900 | 3.74877900  | 0.52056900  | F  | -0.75405500 | 4.36851600  | 0.49119300  |
| F  | 1.08957200  | 2.91589000  | 0.77113800  | F  | 1.64084000  | 3.53148800  | -0.20141900 |
| F  | 0.52809500  | 5.20721000  | -0.20201500 | F  | 0.30594600  | 5.02327600  | -1.73797300 |
| F  | -0.90045200 | 1.62337100  | 3.15800200  | F  | 1.08453300  | 1.60473700  | 2.57383700  |
| F  | -1.84426400 | -0.83715900 | 2.97624700  | F  | -1.55338300 | 1.38605300  | 2.78732600  |
| F  | -0.27651600 | -0.15995800 | 4.84793200  | F  | -0.03390700 | 1.03472100  | 4.78252300  |
| F  | 1.55710400  | 0.67048900  | 3.31219100  | F  | 1.35597000  | -0.77562400 | 3.69305400  |
| F  | 0.61708000  | -1.79063300 | 3.12621100  | F  | -1.25858000 | -0.99575700 | 3.88885100  |

HS – *SPY-5*'

|    |             |             |             |
|----|-------------|-------------|-------------|
| Te | -3.47187200 | -0.20228000 | -0.76404200 |
| Te | 3.49944000  | 0.00946300  | -0.65841900 |
| Mn | 0.01697100  | -0.00089900 | -0.46833100 |
| F  | 0.63065600  | 2.59999900  | -2.48953700 |
| F  | -1.47189500 | -3.04860600 | 0.19684700  |
| F  | -0.76757300 | -3.62386500 | -2.28489700 |
| F  | 3.17477100  | -1.41994600 | 0.49591700  |
| F  | -3.37599200 | 1.53092600  | -0.08229700 |
| F  | 3.31695800  | -1.11072900 | -2.14634400 |
| F  | -3.90390600 | 0.50419900  | -2.44671500 |
| F  | -3.90674400 | -1.90223600 | -1.41480400 |
| F  | -3.33684800 | -0.88268300 | 0.96649900  |
| F  | 4.00326600  | 1.06219000  | 0.79955900  |
| O  | 0.65127800  | -1.70982600 | -1.02323700 |
| O  | -0.51171100 | 1.79573900  | -0.11515100 |
| O  | -1.71564000 | -0.40520900 | -1.21848000 |
| O  | 1.80345300  | 0.67409900  | -0.69389200 |
| F  | 4.11030400  | 1.36424400  | -1.79923700 |
| F  | -5.31512100 | -0.06504100 | -0.41490500 |
| F  | 5.28704800  | -0.57250900 | -0.65002300 |
| O  | -0.15620400 | -0.57157900 | 1.45849500  |

HS – *TBPY-5*

|    |             |             |             |
|----|-------------|-------------|-------------|
| Te | -2.48984700 | -2.67694000 | -0.61116000 |
| Te | 2.05001500  | 2.17235300  | -1.81326100 |
| Mn | -0.00884800 | -0.16554300 | -0.28068800 |
| F  | -2.50012500 | 1.50912300  | -2.15482300 |
| F  | 1.23533100  | -3.02862600 | 1.01467100  |
| F  | 1.86096400  | -3.62793900 | -1.47585300 |
| F  | 3.02288200  | 1.47377800  | -0.37517300 |
| F  | -2.71571400 | -1.99581700 | 1.11671800  |
| F  | 2.64828300  | 0.79365100  | -2.93064500 |
| F  | -3.78344800 | -1.50876600 | -1.28913000 |
| F  | -2.48286700 | -3.55498300 | -2.26910900 |
| F  | -1.46623200 | -4.08407200 | 0.07972100  |
| F  | 1.73620300  | 3.72674000  | -0.82329400 |
| O  | 1.57291300  | -1.01922500 | -0.86190300 |
| O  | -1.55676500 | 0.77806100  | 0.31176500  |
| O  | -1.07359000 | -1.63282700 | -1.05696800 |
| O  | 0.46127200  | 1.39645800  | -1.37958400 |
| F  | 1.31987000  | 3.02869100  | -3.31379800 |
| F  | -3.95776400 | -3.78318700 | -0.20770700 |
| F  | 3.65584600  | 3.02031800  | -2.30463200 |
| O  | 0.58722200  | -0.26490300 | 1.60599800  |

|    |             |             |             |    |             |             |             |
|----|-------------|-------------|-------------|----|-------------|-------------|-------------|
| Te | 2.52312100  | -2.43496500 | -0.19584400 | Te | 1.08429000  | -3.29786800 | -0.49931300 |
| Te | -2.63759300 | 2.08639400  | -0.38093200 | Te | -1.03209200 | 3.11925500  | -1.05268800 |
| Te | 0.55964700  | 0.86712900  | 3.02403000  | Te | -0.11904300 | 0.53716500  | 2.88219100  |
| F  | 3.55895300  | -3.89111700 | 0.38129100  | F  | 1.18444100  | -5.13421200 | -0.09170400 |
| F  | 3.94973300  | -2.05297600 | -1.34144400 | F  | 2.76231800  | -3.55054300 | -1.30495100 |
| F  | 3.38701400  | -1.48546300 | 1.15580600  | F  | 1.92603100  | -3.04870800 | 1.15521500  |
| F  | -4.17411200 | 1.05411400  | -0.13879400 | F  | -2.71594200 | 2.76131700  | -1.80639700 |
| F  | -2.95799000 | 2.83550700  | 1.29879100  | F  | -1.88226900 | 4.03967300  | 0.33948800  |
| F  | -1.34653700 | 3.39903200  | -0.66878400 | F  | 0.61445900  | 3.80313900  | -0.47964400 |
| F  | -3.83588500 | 3.37569100  | -1.04353300 | F  | -1.15502100 | 4.73121200  | -2.01877600 |
| F  | 0.31125300  | 2.43107900  | 2.02255200  | F  | 0.50811000  | 2.18726300  | 2.23156600  |
| F  | -1.27857400 | 0.73733500  | 3.34691100  | F  | -1.90570500 | 1.06261700  | 2.61386900  |
| F  | 0.56407500  | 2.00462400  | 4.52312200  | F  | -0.26488800 | 1.40559600  | 4.55057400  |
| F  | 2.40742100  | 1.17284600  | 3.00697700  | F  | 1.63652700  | 0.11751700  | 3.41946000  |
| F  | 0.84307900  | -0.51051300 | 4.26520800  | F  | -0.72009300 | -0.99561500 | 3.79557200  |
| IS |             |             |             | LS |             |             |             |
| Te | -3.26713100 | -1.21054900 | -0.60364700 | Te | 3.08771700  | 1.53640100  | -0.63869200 |
| Te | 3.33324200  | 0.86569600  | -0.65543000 | Te | -3.17889700 | -1.38827500 | -0.62399600 |
| Mn | 0.01681700  | -0.03233600 | -0.45198400 | Mn | -0.01177800 | -0.02244600 | -0.47761400 |
| F  | -0.23572600 | 2.40649900  | -2.60663800 | F  | 0.62749500  | -2.38462300 | -2.46478500 |
| F  | -0.57658800 | -3.34040100 | 0.36548800  | F  | 0.10593700  | 3.35748000  | 0.19572000  |
| F  | 0.26993100  | -3.87823000 | -2.09201800 | F  | -0.82287500 | 3.72038000  | -2.25815200 |
| F  | 3.37484900  | -0.57947600 | 0.52692900  | F  | -3.46105700 | 0.11742200  | 0.44169100  |
| F  | -3.66400900 | 0.48512300  | 0.05843600  | F  | 3.71047400  | -0.05547800 | 0.10743800  |
| F  | 3.47209300  | -0.28044900 | -2.12989000 | F  | -3.44872400 | -0.38545400 | -2.18112900 |
| F  | -3.91884000 | -0.69431300 | -2.28263200 | F  | 3.86073300  | 1.05473600  | -2.27745100 |
| F  | -3.19772400 | -2.97217400 | -1.22755400 | F  | 2.78004700  | 3.24259800  | -1.34386600 |
| F  | -2.88542400 | -1.78737000 | 1.12748600  | F  | 2.56778100  | 2.11623900  | 1.05691800  |
| F  | 3.51591900  | 2.03853100  | 0.79013600  | F  | -3.22092200 | -2.46326400 | 0.90576700  |
| O  | 1.05361500  | -1.53270400 | -1.00839500 | O  | -1.22301600 | 1.30747500  | -1.14909100 |
| O  | -0.99359200 | 1.55464700  | -0.09628900 | O  | 1.17525000  | -1.45146100 | 0.05664200  |
| O  | -1.53350800 | -0.89624500 | -1.10474900 | O  | 1.43211300  | 0.94476900  | -1.17592100 |
| O  | 1.50603200  | 1.07078300  | -0.73449100 | O  | -1.34440700 | -1.32588400 | -0.65314200 |
| F  | 3.56716200  | 2.31810600  | -1.81615200 | F  | -3.17339100 | -2.94037800 | -1.67263500 |
| F  | -5.05892600 | -1.61409200 | -0.20073500 | F  | 4.78705700  | 2.21743300  | -0.20736100 |
| F  | 5.21147200  | 0.78158800  | -0.62066900 | F  | -5.04899100 | -1.58077600 | -0.61726200 |
| O  | 0.07473900  | -0.47990000 | 1.31062900  | O  | -0.18277500 | 0.58296700  | 1.24412600  |

|    |             |             |             |    |             |             |             |
|----|-------------|-------------|-------------|----|-------------|-------------|-------------|
| Te | -1.53400800 | 3.04452200  | -0.65368200 | O  | 0.03576700  | 0.02488700  | 1.23104500  |
| Te | 1.50269000  | -2.97503100 | -0.90008200 | Te | 2.46207900  | -2.36917300 | -0.81932600 |
| Te | 0.12692000  | -0.22583800 | 2.89222000  | Te | -2.47399600 | 2.46370300  | -0.57577100 |
| F  | -1.90984200 | 4.85254200  | -0.28104200 | Te | 0.10282500  | -0.21037100 | 3.00057000  |
| F  | -3.23317800 | 3.02769900  | -1.45466600 | F  | 3.40016800  | -3.95067600 | -0.50494900 |
| F  | -2.32535400 | 2.71328200  | 1.01132800  | F  | 3.61290500  | -2.15412700 | -2.26502500 |
| F  | 3.12027800  | -2.35972400 | -1.62978000 | F  | 3.73489000  | -1.57699500 | 0.26777200  |
| F  | 2.46321200  | -3.76220700 | 0.50159500  | F  | -3.69842800 | 2.32221800  | -1.96890200 |
| F  | -0.02373600 | -3.91596100 | -0.35773400 | F  | -3.70282400 | 1.63948500  | 0.53772400  |
| F  | 1.88751200  | -4.54156800 | -1.86984700 | F  | -1.39526600 | 2.84844000  | 0.87466200  |
| F  | -0.25542400 | -1.99889800 | 2.41857000  | F  | -3.37807400 | 4.03925400  | -0.14859600 |
| F  | 1.96776900  | -0.51314900 | 2.68541300  | F  | -1.62889400 | 0.39627600  | 3.31307500  |
| F  | 0.36699500  | -0.89601500 | 4.63446000  | F  | -0.52779500 | -1.96061500 | 2.97571500  |
| F  | -1.67183700 | -0.01265100 | 3.38022700  | F  | 0.16996300  | -0.44581300 | 4.85769000  |
| F  | 0.48416600  | 1.44874500  | 3.65652800  | F  | 0.74171800  | 1.49861800  | 3.36970700  |
|    |             |             |             | F  | 1.85026000  | -0.84888400 | 3.02939400  |

#### M06

HS – SPY-5

|    |             |             |             |
|----|-------------|-------------|-------------|
| Te | -2.48303700 | -2.39337200 | -0.80473900 |
| Te | 2.39612900  | 2.50677700  | -0.71975200 |
| Mn | -0.01951700 | 0.03616600  | -0.76019100 |
| F  | -1.43162200 | 3.54808100  | -1.66377200 |
| F  | 1.45826100  | -2.82167300 | 0.66388100  |
| F  | 1.37341500  | -3.41750000 | -1.89780400 |
| F  | 2.88527700  | 1.41276500  | 0.68689100  |
| F  | -2.92118600 | -1.37930000 | 0.67664800  |
| F  | 3.42467100  | 1.49147200  | -1.88606100 |
| F  | -3.47787200 | -1.27123200 | -1.89959900 |
| F  | -2.28440800 | -3.54805000 | -2.24986400 |
| F  | -1.76232300 | -3.70297200 | 0.28833100  |
| F  | 1.62077100  | 3.70190100  | 0.46413900  |
| O  | 1.63433600  | -0.79908300 | -1.18830500 |
| O  | -1.68691000 | 0.90076900  | -1.05191000 |
| O  | -0.87644300 | -1.62164100 | -1.13857200 |
| O  | 0.81976800  | 1.70563000  | -1.11699900 |
| F  | 2.15503500  | 3.75003300  | -2.08218300 |
| F  | -4.10347100 | -3.27285900 | -0.51766100 |
| F  | 3.98125100  | 3.42859300  | -0.37547900 |

HS – SPY-5'

|    |             |             |             |
|----|-------------|-------------|-------------|
| Te | -3.39723300 | -0.69761800 | -0.53642600 |
| Te | 3.45290000  | 0.58115100  | -0.55158900 |
| Mn | 0.01457200  | 0.05099800  | -0.37906300 |
| F  | 0.08693400  | 2.39819500  | -2.57792000 |
| F  | -0.91803600 | -3.30437500 | 0.03702100  |
| F  | -0.31727100 | -3.39702200 | -2.52373800 |
| F  | 3.38681100  | -0.98516000 | 0.43115400  |
| F  | -3.52602700 | 0.98621200  | 0.21906100  |
| F  | 3.42648900  | -0.38018900 | -2.13939900 |
| F  | -3.97974600 | -0.00385500 | -2.15939500 |
| F  | -3.59551600 | -2.39902600 | -1.25097400 |
| F  | -3.10275000 | -1.42367500 | 1.13881000  |
| F  | 3.79337400  | 1.53008900  | 1.00388800  |
| O  | 0.87543600  | -1.50480300 | -1.03938400 |
| O  | -0.75579700 | 1.76812400  | -0.07594100 |
| O  | -1.65357400 | -0.61543600 | -1.03003700 |
| O  | 1.68360300  | 0.95608900  | -0.51902100 |
| F  | 3.81342600  | 2.11905000  | -1.53107900 |
| F  | -5.21303300 | -0.84669000 | -0.12743900 |
| F  | 5.29824200  | 0.30440400  | -0.60222800 |

|    |             |             |             |    |             |             |             |
|----|-------------|-------------|-------------|----|-------------|-------------|-------------|
| O  | -0.00969000 | -0.54799300 | 1.54777000  | O  | 0.56522200  | -0.23018300 | 1.64276700  |
| Te | 0.65090700  | -3.30022900 | -0.94080700 | Te | 2.43893600  | -2.53434000 | -0.19165600 |
| Te | -0.68807500 | 3.25141200  | -1.11458400 | Te | -2.59023800 | 2.13943600  | -0.40503900 |
| Te | -0.01848200 | 0.15121200  | 3.20168800  | Te | 0.63839400  | 0.93222200  | 3.01831800  |
| F  | 0.50170800  | -5.16025100 | -0.93024600 | F  | 3.45809500  | -4.00885300 | 0.32268000  |
| F  | 2.20848500  | -3.58494100 | -1.91145900 | F  | 3.79116500  | -2.20462400 | -1.41763000 |
| F  | 1.61337800  | -3.51883600 | 0.62455000  | F  | 3.40600700  | -1.61080700 | 1.08720500  |
| F  | -2.35537900 | 2.96029800  | -1.87822800 | F  | -4.10917000 | 1.11284700  | -0.13019200 |
| F  | -1.49692800 | 4.30620800  | 0.17697600  | F  | -2.88321900 | 2.92597900  | 1.24692500  |
| F  | 0.96828000  | 3.83363900  | -0.52606400 | F  | -1.29763600 | 3.41762300  | -0.74519000 |
| F  | -0.66364200 | 4.78856100  | -2.17018200 | F  | -3.78245400 | 3.40944300  | -1.07531100 |
| F  | 0.83735200  | 1.74354600  | 2.75966800  | F  | 0.42320800  | 2.46400400  | 1.98860100  |
| F  | -1.67073000 | 0.99318500  | 3.05137000  | F  | -1.17769600 | 0.89653200  | 3.40226800  |
| F  | -0.02400100 | 0.83483200  | 4.94436600  | F  | 0.74857900  | 2.10152300  | 4.47080300  |
| F  | 1.62578000  | -0.58055400 | 3.68356000  | F  | 2.48161500  | 1.14511000  | 2.92483400  |
| F  | -0.86220000 | -1.32375900 | 3.96667900  | F  | 0.89677700  | -0.41171100 | 4.27945900  |

HS – *TBPY-5*

|    |             |             |             |
|----|-------------|-------------|-------------|
| Te | -2.59081200 | -2.59322500 | -0.54528200 |
| Te | 2.10787000  | 2.06933500  | -1.85768200 |
| Mn | -0.02172800 | -0.15791000 | -0.23664100 |
| F  | -2.47729600 | 1.52569100  | -2.15186400 |
| F  | 1.23072500  | -3.08131200 | 1.09758000  |
| F  | 1.66060700  | -3.69843000 | -1.41002200 |
| F  | 3.09419600  | 1.38173900  | -0.44290900 |
| F  | -2.90662400 | -1.83642400 | 1.11947000  |
| F  | 2.65014500  | 0.67074200  | -2.95470100 |
| F  | -3.82983200 | -1.46022500 | -1.33643600 |
| F  | -2.50253600 | -3.54293300 | -2.14349900 |
| F  | -1.61708000 | -3.94967100 | 0.26729400  |
| F  | 1.83907000  | 3.63101000  | -0.89205000 |
| O  | 1.50140200  | -1.10011100 | -0.78863100 |
| O  | -1.50473300 | 0.86996900  | 0.31039500  |
| O  | -1.16018100 | -1.58096300 | -0.96442200 |
| O  | 0.53065400  | 1.33313300  | -1.37767300 |
| F  | 1.36692300  | 2.90593400  | -3.34622100 |
| F  | -4.07265200 | -3.66799900 | -0.17204600 |
| F  | 3.70558500  | 2.87534500  | -2.39280100 |

IS

|    |             |             |             |
|----|-------------|-------------|-------------|
| Te | -3.34953500 | -1.05885300 | -0.52666300 |
| Te | 3.33046900  | 0.84489200  | -0.68299900 |
| Mn | -0.02144400 | 0.01048700  | -0.41925000 |
| F  | -0.26894100 | 2.39394600  | -2.54237900 |
| F  | -0.62609000 | -3.43546900 | 0.26411600  |
| F  | 0.09183800  | -3.75426600 | -2.24214500 |
| F  | 3.42828800  | -0.64886500 | 0.40464400  |
| F  | -3.70920200 | 0.61882700  | 0.16559500  |
| F  | 3.41420100  | -0.21491600 | -2.20434900 |
| F  | -4.02389100 | -0.51275000 | -2.17124200 |
| F  | -3.32018800 | -2.80194000 | -1.16442900 |
| F  | -2.95698900 | -1.65462900 | 1.18176200  |
| F  | 3.55509700  | 1.92635200  | 0.80773700  |
| O  | 0.93967000  | -1.53069800 | -1.02532100 |
| O  | -0.94962900 | 1.64585500  | -0.01131000 |
| O  | -1.63870800 | -0.75329600 | -1.04523000 |
| O  | 1.52474100  | 1.03098900  | -0.67299900 |
| F  | 3.52005300  | 2.34547200  | -1.76303300 |
| F  | -5.12785200 | -1.43721200 | -0.09845100 |
| F  | 5.19500900  | 0.77059900  | -0.71994500 |

|    |             |             |             |
|----|-------------|-------------|-------------|
| O  | 0.03661200  | -0.53706800 | 1.35174700  |
| Te | 0.97569000  | -3.30677900 | -0.66339100 |
| Te | -1.00175400 | 3.16183500  | -1.00443200 |
| Te | 0.04824400  | 0.36322500  | 2.94328000  |
| F  | 1.09000500  | -5.15615500 | -0.41199200 |
| F  | 2.60038200  | -3.50168400 | -1.55148900 |
| F  | 1.88455600  | -3.19621100 | 0.95255500  |
| F  | -2.69341000 | 2.82220200  | -1.70207200 |
| F  | -1.79225200 | 4.14047400  | 0.36198400  |
| F  | 0.65419200  | 3.82762800  | -0.49231400 |
| F  | -1.11085400 | 4.73172100  | -2.01059700 |
| F  | 0.79279900  | 1.95011500  | 2.34092400  |
| F  | -1.66079600 | 1.06895200  | 2.81333200  |
| F  | 0.08311300  | 1.15544500  | 4.63276300  |
| F  | 1.75157500  | -0.24740400 | 3.36076700  |
| F  | -0.65145000 | -1.11612100 | 3.81990500  |

LS

|    |             |             |             |
|----|-------------|-------------|-------------|
| Te | -1.43561800 | -3.24231800 | -0.64969200 |
| Te | 1.55697100  | 2.78125900  | -1.41855000 |
| Mn | 0.11079400  | -0.13377500 | -0.23723500 |
| F  | -2.41690200 | 0.98957000  | -2.58260800 |
| F  | 2.23521500  | -2.54669500 | 1.10891200  |
| F  | 2.87183400  | -2.84164400 | -1.42739400 |
| F  | 2.75252600  | 2.32496500  | -0.07938100 |
| F  | -2.51040500 | -2.59291800 | 0.70984700  |
| F  | 2.45969900  | 1.71957300  | -2.64531000 |
| F  | -2.44319700 | -2.37426100 | -1.94369300 |
| F  | -0.54430000 | -4.14771700 | -2.00625600 |
| F  | -0.59674200 | -4.35239500 | 0.57891700  |
| F  | 0.84497200  | 4.07843600  | -0.30008500 |
| O  | 1.94569000  | -0.42237900 | -0.65493500 |
| O  | -1.77374200 | 0.14084500  | -0.08139100 |
| O  | -0.13941800 | -1.97738100 | -0.55956900 |
| O  | 0.26210500  | 1.57289200  | -1.01855000 |
| F  | 0.54098600  | 3.47244200  | -2.81377800 |
| F  | -2.70141600 | -4.60592500 | -0.79326800 |
| F  | 2.80207400  | 4.09219400  | -1.88450400 |

|    |             |             |             |
|----|-------------|-------------|-------------|
| O  | 0.49421400  | 0.12802500  | 1.62087600  |
| Te | 3.23307700  | -1.57499300 | -0.11451000 |
| Te | -3.04906900 | 1.18210900  | -0.84278100 |
| Te | -0.30934700 | 0.86841700  | 3.06561300  |
| F  | 4.63934700  | -2.71248700 | 0.35408200  |
| F  | 4.47021800  | -0.78282700 | -1.25466100 |
| F  | 3.85568100  | -0.50203600 | 1.26633300  |
| F  | -4.18879000 | -0.26109800 | -1.10229300 |
| F  | -3.90093100 | 1.49828700  | 0.77492500  |
| F  | -2.21063200 | 2.82737700  | -0.70023500 |
| F  | -4.43866900 | 2.16712800  | -1.61264800 |
| F  | -1.18139100 | 2.22528700  | 2.15113600  |
| F  | -1.83477000 | -0.18447800 | 3.01644900  |
| F  | -1.06441900 | 1.61770800  | 4.59984700  |
| F  | 1.10700100  | 2.02646700  | 3.39379200  |
| F  | 0.46707600  | -0.35098300 | 4.23579500  |

TPSSh

HS – SPY-5

|    |             |             |             |
|----|-------------|-------------|-------------|
| Te | 3.38560000  | -0.80276000 | -0.37325500 |
| Te | -3.43865700 | 0.71798300  | -0.46302900 |
| Mn | -0.02769800 | 0.02376900  | -0.23652500 |
| F  | -1.62646200 | -2.55220200 | -2.64196700 |
| F  | 2.35804000  | 3.19008500  | -0.32045800 |
| F  | 1.61213900  | 2.00984900  | -2.60241800 |
| F  | -2.83626400 | 2.01578000  | 0.72734300  |
| F  | 2.84733500  | -2.37406200 | 0.47101100  |
| F  | -3.30330500 | 1.93781600  | -1.87327400 |
| F  | 2.88515000  | -1.47779700 | -2.04207700 |
| F  | 4.21964200  | 0.62762800  | -1.23950100 |
| F  | 4.16304600  | -0.22612000 | 1.22215600  |
| F  | -3.87074200 | -0.39870800 | 0.96567700  |
| O  | -0.09731500 | 1.93861100  | -0.44680300 |
| O  | 0.20068700  | -1.81632400 | -0.72449300 |
| O  | 1.86037100  | 0.16890900  | -0.07509700 |
| O  | -1.82887200 | -0.08035700 | -0.82877500 |
| F  | -4.31566600 | -0.45960600 | -1.62075300 |
| F  | 5.00841800  | -1.70715600 | -0.66450200 |



|    |             |             |             |    |             |             |             |
|----|-------------|-------------|-------------|----|-------------|-------------|-------------|
| F  | -5.14225900 | 1.46641000  | -0.19387800 | F  | 1.04155500  | 5.09041400  | 1.77302100  |
| O  | -0.51349300 | -0.13873100 | 1.71919000  | O  | 0.47423800  | -1.64703000 | 1.02506500  |
| Te | 0.82872800  | 3.20107500  | -1.38719100 | Te | 3.53404200  | -0.29980100 | 0.10841700  |
| Te | -0.76669700 | -3.30392300 | -1.16137200 | Te | -3.39316300 | 0.37359900  | 0.27414000  |
| Te | -0.01934300 | 0.18268700  | 3.43157100  | Te | -0.30970700 | -3.04345300 | 1.89160100  |
| F  | 1.71967200  | 4.54657200  | -2.35154400 | F  | 5.25404800  | -1.01063400 | -0.15361500 |
| F  | -0.55635500 | 3.48445000  | -2.61365100 | F  | 4.41782900  | 1.13157700  | 0.92293900  |
| F  | 0.14156000  | 4.59594700  | -0.34978800 | F  | 3.58093800  | -1.20698700 | 1.74075100  |
| F  | 0.57998700  | -3.92323900 | -2.30264900 | F  | -4.05292500 | -0.32478000 | -1.32388500 |
| F  | -0.02244600 | -4.33052300 | 0.21104500  | F  | -4.03260000 | -1.15014700 | 1.14235100  |
| F  | -2.24959400 | -2.96931800 | -0.08259900 | F  | -3.01311600 | 1.13571200  | 1.93580100  |
| F  | -1.66874400 | -4.88283600 | -1.64150900 | F  | -5.12848700 | 1.04953600  | 0.53035900  |
| F  | -0.97388000 | -1.28054800 | 4.12247600  | F  | -1.54049700 | -2.01188600 | 2.85299400  |
| F  | 1.52821600  | -0.87641100 | 3.39458400  | F  | -1.59438100 | -3.43661200 | 0.59535100  |
| F  | 0.45341700  | 0.49284700  | 5.23073200  | F  | -1.04207100 | -4.50325900 | 2.82487200  |
| F  | -1.49016200 | 1.28190500  | 3.82095700  | F  | 0.87119000  | -2.92868800 | 3.34199500  |
| F  | 1.01265900  | 1.70764400  | 3.07806000  | F  | 0.83100500  | -4.30832000 | 1.11771100  |

HS – *SPY-5'*

|    |             |             |             |
|----|-------------|-------------|-------------|
| Te | -0.19944000 | -0.48033600 | -3.46624000 |
| Te | 0.36877200  | 3.44332400  | 1.16243500  |
| Mn | 0.09564700  | 0.04838200  | 0.14851300  |
| F  | -3.06177600 | 1.99126000  | -0.58782700 |
| F  | 2.92328400  | -1.83631300 | -0.74644600 |
| F  | 3.79177100  | 0.52653400  | -1.54469800 |
| F  | 1.47168300  | 2.69009800  | 2.47217500  |
| F  | -1.25555700 | -1.95534400 | -2.99846800 |
| F  | 1.78705900  | 3.49736600  | -0.05097500 |
| F  | -1.68937300 | 0.64742800  | -3.32029100 |
| F  | 0.75486200  | 0.92831700  | -4.25970400 |
| F  | 1.19124400  | -1.64648800 | -3.94260800 |
| F  | -0.95549300 | 3.69291500  | 2.46101000  |
| O  | 1.91058700  | 0.50006400  | 0.41632100  |
| O  | -1.73901200 | -0.37750400 | 0.01786300  |
| O  | 0.46151200  | -0.16155800 | -1.80914400 |
| O  | -0.36893400 | 1.87708400  | 0.58660000  |
| F  | -0.64702000 | 4.47572700  | -0.02103800 |
| F  | -0.82812100 | -0.80312400 | -5.21341300 |

HS – *TBPY-5*

|    |             |             |             |
|----|-------------|-------------|-------------|
| Te | -0.21150200 | -2.83424300 | -2.19093200 |
| Te | 0.14154600  | 3.56506900  | -0.92653400 |
| Mn | 0.06372500  | 0.10652700  | -0.03724500 |
| F  | -2.92383900 | 0.82391000  | -1.83291800 |
| F  | 2.99043900  | -1.79173200 | 0.44370400  |
| F  | 3.60677300  | -0.78981600 | -1.91747400 |
| F  | 1.63941800  | 3.61630500  | 0.19182000  |
| F  | -1.24414600 | -3.45581100 | -0.76155700 |
| F  | 1.17626800  | 2.90516300  | -2.33827200 |
| F  | -1.75974700 | -2.33940600 | -3.11943800 |
| F  | 0.77901400  | -2.50580800 | -3.74732500 |
| F  | 1.30097400  | -3.62607300 | -1.42457700 |
| F  | -0.82009800 | 4.52352100  | 0.36388300  |
| O  | 1.84570500  | 0.60042900  | -0.39225800 |
| O  | -1.72811400 | -0.30055100 | 0.40031100  |
| O  | 0.09990100  | -1.17428700 | -1.52668800 |
| O  | -0.49869500 | 1.95881600  | -0.35037800 |
| F  | -1.27368600 | 3.82988300  | -2.12443500 |
| F  | -0.51193800 | -4.53466300 | -2.94183900 |

|    |             |             |             |    |             |             |             |
|----|-------------|-------------|-------------|----|-------------|-------------|-------------|
| F  | 0.72552700  | 5.25758500  | -1.50731500 | F  | 5.36596100  | 0.06227400  | -0.80075200 |
| O  | 0.59306800  | -0.47072100 | 1.77280500  | O  | 0.00789200  | -0.42144500 | 1.52468900  |
| Te | 3.51920600  | -0.11760000 | -0.17734400 | Te | 0.52105900  | -3.46279200 | -0.59387000 |
| Te | -3.40666600 | 0.21767300  | -0.13575300 | Te | -0.51420900 | 3.28005700  | -1.09236200 |
| Te | -0.04746200 | -0.83836700 | 3.43451800  | Te | -0.09375700 | 0.43659900  | 3.14695500  |
| F  | 5.27642100  | -0.75991800 | -0.00720300 | F  | 0.31674500  | -5.32408200 | -0.40479100 |
| F  | 4.31177200  | 1.45925500  | -0.78826800 | F  | 2.06517600  | -3.89746100 | -1.56063800 |
| F  | 3.73562600  | 0.48726300  | 1.57438300  | F  | 1.50856400  | -3.57225400 | 0.98984000  |
| F  | -3.81170600 | -1.45521600 | -0.85678600 | F  | -2.21605200 | 3.09490900  | -1.85320600 |
| F  | -4.15252400 | -0.35370100 | 1.47744000  | F  | -1.26776900 | 4.34443200  | 0.24811400  |
| F  | -3.32674400 | 1.94899900  | 0.55081100  | F  | 1.18556900  | 3.78814000  | -0.50521900 |
| F  | -5.16354700 | 0.67136500  | -0.62514100 | F  | -0.43539500 | 4.86248400  | -2.10761600 |
| F  | -1.37881000 | 0.47702100  | 3.45165200  | F  | 0.81088800  | 1.99835000  | 2.65430000  |
| F  | -1.29202000 | -2.13250500 | 2.91326300  | F  | -1.74489000 | 1.26774500  | 2.85626000  |
| F  | -0.63223700 | -1.22210100 | 5.18263900  | F  | -0.18603800 | 1.21696200  | 4.85824400  |
| F  | 1.11700000  | 0.36723500  | 4.27495000  | F  | 1.52907600  | -0.28808600 | 3.74568800  |
| F  | 1.20576200  | -2.19900500 | 3.73413800  | F  | -0.98226500 | -1.01186200 | 3.93968200  |
| IS |             |             |             | LS |             |             |             |
| Te | -3.43326100 | -0.63483200 | -0.71950200 | Te | -0.38542400 | -1.78596800 | -2.99190200 |
| Te | 3.51593400  | 0.38152400  | -0.68642500 | Te | 0.57917600  | 3.53014100  | -0.01282100 |
| Mn | 0.04333000  | -0.00229100 | -0.33149400 | Mn | 0.13159100  | 0.04966600  | -0.00006900 |
| F  | 0.21324800  | 2.44440700  | -2.60927000 | F  | -2.95801700 | 1.74045500  | -1.34083800 |
| F  | -1.05334400 | -3.34033500 | 0.40176400  | F  | 2.76909000  | -2.18729000 | 0.00983100  |
| F  | -0.47350500 | -3.68398200 | -2.16667400 | F  | 3.70416100  | -0.55737200 | -1.86047600 |
| F  | 3.48046500  | -1.11063300 | 0.43139300  | F  | 1.82364900  | 3.15513900  | 1.32870300  |
| F  | -3.62114900 | 1.06836100  | 0.01186100  | F  | -1.52844200 | -2.81187200 | -1.92968000 |
| F  | 3.39834700  | -0.70277700 | -2.20524800 | F  | 1.82266600  | 3.14542600  | -1.35253500 |
| F  | -3.80459400 | 0.05577400  | -2.41948700 | F  | -1.72506100 | -0.51902900 | -3.29477300 |
| F  | -3.57983000 | -2.35437200 | -1.43688600 | F  | 0.66143700  | -0.94424600 | -4.29697500 |
| F  | -3.35121000 | -1.35433100 | 0.99891200  | F  | 0.85976900  | -3.18255200 | -2.95185100 |
| F  | 3.95049300  | 1.45055700  | 0.78361000  | F  | -0.56902200 | 4.22050100  | 1.29323400  |
| O  | 0.79793400  | -1.67174500 | -0.86476900 | O  | 1.99705300  | 0.49527900  | -0.00133800 |
| O  | -0.65229200 | 1.76282200  | -0.06909700 | O  | -1.73774700 | -0.36486900 | 0.00101900  |
| O  | -1.62615200 | -0.59355400 | -1.00963300 | O  | 0.44173200  | -0.88402200 | -1.63038500 |
| O  | 1.73497900  | 0.80685800  | -0.60992500 | O  | -0.26962600 | 1.90182800  | -0.00671400 |
| F  | 3.86349000  | 1.84036200  | -1.80493000 | F  | -0.56990400 | 4.21114500  | -1.32300400 |
| F  | -5.30108200 | -0.74737200 | -0.52629200 | F  | -1.14867500 | -2.71528100 | -4.43764600 |

|    |             |             |             |   |             |             |             |
|----|-------------|-------------|-------------|---|-------------|-------------|-------------|
| F  | 1.34323900  | 5.24910100  | -0.01931800 | F | -2.96010500 | 1.75112500  | 1.32430800  |
| O  | 0.44071100  | -0.87125000 | 1.63769400  | F | -5.06336400 | 1.28881600  | -0.00804600 |
| Te | 3.54170300  | -0.48522700 | 0.00288900  | F | -1.72725400 | -0.49105100 | 3.29701900  |
| Te | -3.35482200 | 0.49716400  | -0.00356900 | F | -1.53160800 | -2.79483400 | 1.95014900  |
| Te | -0.38866700 | -1.76172900 | 3.00543200  | F | -1.15433900 | -2.67883600 | 4.45766300  |
| F  | 5.18734800  | -1.39867300 | 0.00687600  | F | 0.65780000  | -0.91085200 | 4.30488500  |
| F  | 4.58628700  | 1.06840700  | -0.00329300 | F | 0.85516000  | -3.15984600 | 2.97771000  |
| F  | 3.70362300  | -0.54206000 | 1.86683500  |   |             |             |             |
| F  | -4.06544800 | -0.64920600 | -1.29821900 |   |             |             |             |
| F  | -4.06731700 | -0.63880300 | 1.29921700  |   |             |             |             |

### [MnF<sub>5</sub>]<sup>2-</sup>

#### B3LYP

##### SPY-5

|    |             |             |             |
|----|-------------|-------------|-------------|
| Mn | 0.00003800  | 0.00006900  | -0.08244300 |
| F  | -0.01330500 | 1.84723400  | -0.44328900 |
| F  | 0.01371800  | -1.84755200 | -0.44232400 |
| F  | 1.84911100  | 0.01320100  | -0.40573100 |
| F  | -1.84877000 | -0.01380000 | -0.40679900 |
| F  | -0.00086000 | 0.00072700  | 1.92715100  |

##### TBPY-5

|    |             |             |             |
|----|-------------|-------------|-------------|
| Mn | 0.00000500  | -0.00126100 | -0.00029700 |
| F  | -1.84511300 | -0.00338500 | -0.00073000 |
| F  | 1.84514500  | -0.00350000 | -0.00075900 |
| F  | 0.00003300  | 0.86028900  | 1.75256000  |
| F  | 0.00001100  | 1.09825300  | -1.61418500 |
| F  | -0.00008900 | -1.94815400 | -0.13606200 |

#### M06-L

##### SPY-5

|    |             |             |             |
|----|-------------|-------------|-------------|
| Mn | -0.00001500 | 0.00000900  | -0.08747100 |
| F  | -0.61030300 | 1.74725100  | -0.44555900 |
| F  | 0.61219200  | -1.74894400 | -0.44019300 |
| F  | 1.74966700  | 0.60986800  | -0.39345400 |
| F  | -1.74892900 | -0.61179500 | -0.39505500 |
| F  | -0.00258600 | 0.00359600  | 1.91723700  |

##### TBPY-5

|    |             |             |             |
|----|-------------|-------------|-------------|
| Mn | -0.00011200 | 0.00193100  | 0.00077600  |
| F  | -1.85052300 | 0.00231900  | 0.00131700  |
| F  | 1.85035100  | 0.00263900  | 0.00160200  |
| F  | 0.00039900  | -0.67255900 | -1.83396300 |
| F  | 0.00015200  | -1.25989000 | 1.49239100  |
| F  | -0.00006800 | 1.92212600  | 0.33649700  |

#### M06

##### SPY-5

|    |             |             |             |
|----|-------------|-------------|-------------|
| Mn | -0.00000400 | 0.00011500  | -0.08412700 |
| F  | -0.13310100 | 1.83241900  | -0.44089600 |
| F  | 0.13443800  | -1.83284800 | -0.43917200 |
| F  | 1.83395300  | 0.13314700  | -0.39701900 |
| F  | -1.83351700 | -0.13423300 | -0.39914300 |
| F  | -0.00176200 | 0.00119500  | 1.90991600  |

##### TBPY-5

|    |             |             |             |
|----|-------------|-------------|-------------|
| Mn | -0.00002400 | 0.00141600  | 0.00053000  |
| F  | -1.83547000 | 0.00286500  | 0.00133000  |
| F  | 1.83540300  | 0.00294600  | 0.00145500  |
| F  | 0.00013600  | -0.70449600 | -1.80507800 |
| F  | 0.00001500  | -1.21993200 | 1.50566600  |
| F  | -0.00001800 | 1.91468600  | 0.29515500  |

**TPSSh***SPY-5*

|    |             |             |             |
|----|-------------|-------------|-------------|
| Mn | 0.00004700  | 0.00009700  | -0.08709800 |
| F  | -0.03067900 | 1.84373100  | -0.43705600 |
| F  | 0.03120900  | -1.84397100 | -0.43632800 |
| F  | 1.84536000  | 0.03064600  | -0.40181600 |
| F  | -1.84499700 | -0.03119800 | -0.40308000 |
| F  | -0.00102300 | 0.00052000  | 1.92021900  |

*TBPY-5*

|    |             |             |             |
|----|-------------|-------------|-------------|
| Mn | -0.00000200 | -0.00155000 | -0.00037900 |
| F  | -1.84175800 | -0.00368400 | -0.00093200 |
| F  | 1.84177600  | -0.00375400 | -0.00097900 |
| F  | 0.00004200  | 0.84329800  | 1.75685300  |
| F  | -0.00000300 | 1.11153400  | -1.60069600 |
| F  | -0.00005000 | -1.94308700 | -0.15319300 |

## 7. Bond Valence Sum analysis

To further determine the oxidation state of the Mn centers in both the  $[\text{Mn}(\text{OTeF}_5)_4]^{2-}$  and  $[\text{Mn}(\text{OTeF}_5)_5]^{2-}$  anions, the Bond Valence Sum (BVS) method was employed.<sup>27</sup> According to this analysis, the sum of the valences of the individual bonds  $s_{ij}$  surrounding the  $j$ th atom is equal to its oxidation state  $z_j$ :

$$z_j = \sum_i s_{ij}$$

$$s_{ij} = \exp\left[\frac{R_0 - r_{ij}}{b}\right]$$

where  $r_{ij}$  is the observed bond length,  $R_0$  is a constant that is dependent on the nature of the  $ij$  pair and  $b = 0.37$ .

Whereas for **1\*** the crystal structure has a sufficient quality (see Table S1), for **2** the data set is not good enough to precisely determine bond lengths (see Table S2). Nevertheless, as for the  $[\text{Mn}(\text{OTeF}_5)_4]^{2-}$  anion we have proved that there is a very good agreement between the experimental and the calculated structures, we have performed the Bond Valence Sum analysis with the calculated minimum of the  $[\text{Mn}(\text{OTeF}_5)_5]^{2-}$  anion (as it appears in Figure 3a). The results of these analyses appear in Table S14.

**Table S14.** Results of the BVS analysis for the Mn atom in the  $[\text{Mn}(\text{OTeF}_5)_4]^{2-}$  and  $[\text{Mn}(\text{OTeF}_5)_5]^{2-}$  anions.

|                                     | $R_0^{[a]}$ [Å] | $z_j$ | Assignment |
|-------------------------------------|-----------------|-------|------------|
| $[\text{Mn}(\text{OTeF}_5)_4]^{2-}$ | 1.754           | 1.94  | +II        |
| $[\text{Mn}(\text{OTeF}_5)_5]^{2-}$ | 1.754           | 3.14  | +III       |

[a] Value taken from Ref. 27 to calculate the oxidation state of the Mn atom in Mn complexes with O donor atoms with no prior assumptions.

## 8. References

1. N. S. Gill, F. B. Taylor, W. E. Hatfield, W. E. Parker, C. S. Fountain and F. L.unger, Tetrahalo Complexes of Dipositive Metals in the First Transition Series, *Inorg. Synth.*, 1967, **IX**, 136-142.
2. M. R. Colman, T. D. Newbound, L. J. Marshall, M. D. Noirot, M. M. Miller, G. P. Wulfsberg, J. S. Frye, O. P. Anderson and S. H. Strauss, Silver(I) Complexes of Dichloromethane and 1,2-Dichloroethane, *J. Am. Chem. Soc.*, 1990, **112**, 2349-2362.
3. S. H. Strauss, M. D. Noirot and O. P. Anderson, Preparation and Characterization of Silver(I) Teflate Complexes: Bridging OTeF<sub>5</sub> Groups in the Solid State and in Solution, *Inorg. Chem.*, 1985, **24**, 4307-4311.
4. C. J. Schack and K. O. Christe, New syntheses of pentafluorotellurium hypochlorite, *J. Fluorine Chem.*, 1982, **21**, 393-396.
5. S. Stoll and A. Schweiger, EasySpin, a comprehensive software package for spectral simulation and analysis in EPR, *J. Magn. Reson.*, 2006, **178**, 42-55.
6. G. Sheldrick, Structure determination revisited, *Acta Crystallogr. A*, 2015, **71**, s9.
7. G. Sheldrick, Crystal structure refinement with *SHELXL*, *Acta Crystallogr. C*, 2015, **71**, 3-8.
8. O. V. Dolomanov, L. J. Bourhis, R. J. Gildea, J. A. K. Howard and H. Puschmann, *OLEX2*: a complete structure solution, refinement and analysis program, *J. Appl. Crystallogr.*, 2009, **42**, 339-341.
9. K. Brandenburg, *DIAMOND*, Crystal Impact GbR, Bonn, 2014.
10. G. A. Bain and J. F. Berry, Diamagnetic Corrections and Pascal's Constants, *J. Chem. Educ.*, 2008, **85**, 532-536.
11. N. F. Chilton, R. P. Anderson, L. D. Turner, A. Soncini and K. S. Murray, PHI: A Powerful New Program for the Analysis of Anisotropic Monomeric and Exchange-Coupled Polynuclear *d*- and *f*-Block Complexes, *J. Comput. Chem.*, 2013, **34**, 1164-1175.
12. M. J. Frisch, G. W. Trucks, H. B. Schlegel, G. E. Scuseria, M. A. Robb, J. R. Cheeseman, G. Scalmani, V. Barone, G. A. Petersson, H. Nakatsuji, X. Li, M. Caricato, A. V. Marenich, J. Bloino, B. G. Janesko, R. Gomperts, B. Mennucci, H. P. Hratchian, J. V. Ortiz, A. F. Izmaylov, J. L. Sonnenberg, Williams, F. Ding, F. Lipparini, F. Egidi, J. Goings, B. Peng, A. Petrone, T. Henderson, D. Ranasinghe, V. G. Zakrzewski, J. Gao, N. Rega, G. Zheng, W. Liang, M. Hada, M. Ehara, K. Toyota, R. Fukuda, J. Hasegawa, M. Ishida, T. Nakajima, Y. Honda, O. Kitao, H. Nakai, T. Vreven, K. Throssell, J. A. Montgomery Jr., J. E. Peralta, F. Ogliaro, M. J. Bearpark, J. J. Heyd, E. N. Brothers, K. N. Kudin, V. N. Staroverov, T. A. Keith, R. Kobayashi, J. Normand, K. Raghavachari, A. P. Rendell, J. C. Burant, S. S. Iyengar, J. Tomasi, M. Cossi, J. M. Millam, M. Klene, C. Adamo, R. Cammi, J. W. Ochterski, R. L. Martin, K. Morokuma, O. Farkas, J. B. Foresman and D. J. Fox, *Gaussian 16 (Revision C.01)*, Gaussian, Inc., Wallingford CT, 2016.
13. A. D. Becke, A new mixing of Hartree–Fock and local density-functional theories, *J. Chem. Phys.*, 1993, **98**, 1372-1377.
14. S. Grimme, J. Antony, S. Ehrlich and H. Krieg, A consistent and accurate *ab initio* parametrization of density functional dispersion correction (DFT-D) for the 94 elements H–Pu, *J. Chem. Phys.*, 2010, **132**, 154104.
15. E. R. Johnson and A. D. Becke, A post-Hartree–Fock model of intermolecular interactions, *J. Chem. Phys.*, 2005, **123**, 024101.
16. J. Tao, J. P. Perdew, V. N. Staroverov and G. E. Scuseria, Climbing the Density Functional Ladder: Nonempirical Meta–Generalized Gradient Approximation Designed for Molecules and Solids, *Phys. Rev. Lett.*, 2003, **91**, 146401.
17. V. N. Staroverov, G. E. Scuseria, J. Tao and J. P. Perdew, Comparative assessment of a new nonempirical density functional: Molecules and hydrogen-bonded complexes, *J. Chem. Phys.*, 2003, **119**, 12129-12137.

18. V. N. Staroverov, G. E. Scuseria, J. Tao and J. P. Perdew, Erratum: “Comparative assessment of a new nonempirical density functional: Molecules and hydrogen-bonded complexes” [J. Chem. Phys. 119, 12129 (2003)], *J. Chem. Phys.*, 2004, **121**, 11507.
19. Y. Zhao and D. G. Truhlar, The M06 suite of density functionals for main group thermochemistry, thermochemical kinetics, noncovalent interactions, excited states, and transition elements: two new functionals and systematic testing of four M06-class functionals and 12 other functionals, *Theor. Chem. Acc.*, 2008, **120**, 215-241.
20. Y. Zhao and D. G. Truhlar, A new local density functional for main-group thermochemistry, transition metal bonding, thermochemical kinetics, and noncovalent interactions, *J. Chem. Phys.*, 2006, **125**, 194101.
21. F. Weigend and R. Ahlrichs, Balanced basis sets of split valence, triple zeta valence and quadruple zeta valence quality for H to Rn: Design and assessment of accuracy, *Phys. Chem. Chem. Phys.*, 2005, **7**, 3297-3305.
22. F. Neese, Software update: The ORCA program system—Version 5.0, *WIREs Comput. Mol. Sci.*, 2022, **12**, e1606.
23. F. Neese, The ORCA program system, *WIREs Comput. Mol. Sci.*, 2012, **2**, 73-78.
24. F. Weigend, Hartree–Fock exchange fitting basis sets for H to Rn, *J. Comput. Chem.*, 2008, **29**, 167-175.
25. A. Martín Pendás and E. Francisco, *Promolden: A QTAIM/IQA code* (available from the authors upon request).
26. K. Momma and F. Izumi, *VESTA 3* for three-dimensional visualization of crystal, volumetric and morphology data, *J. Appl. Crystallogr.*, 2011, **44**, 1272-1276.
27. G. S. Palenik, Bond Valence Sums in Coordination Chemistry Using Oxidation State Independent R0 Values. A Simple Method for Calculating the Oxidation State of Manganese in Complexes Containing Only Mn–O Bonds, *Inorg. Chem.*, 1997, **36**, 4888-4890.
